# Supplementary material for: Genomics Reveal Admixture and Unexpected Patterns of Diversity in a Parapatric Pair of Butterflies
Source: MDPI journal article supplement (doi:10.3390/genes12122009), 2021-12-17
Supplement: s1 [file s1]

## Genomics reveal admixture and unexpected patterns of diversity in a parapatric pair of butterflies

Tahami et al.

Supplementary material and methods

### (a) Mitochondrial DNA data

We gathered COI sequences for all 71 specimens that were used for ddRADseq analyses (Table S1). For 62 of these specimens, sequences were generated by previous studies (1–3), while for nine specimens COI sequences were newly generated following standard protocols for DNA barcoding (e.g. 2). Sequences were aligned using Geneious Pro 6.1.8 created by Biomatters (<http://www.geneious.com/>). A Neighbor-joining (NJ) tree was built in MEGA X (4) and node supports were assessed based on 100 bootstrap replicates. The 71 COI sequences included four outgroup taxa: *M. britomartis*, 4 sequences; *M. aurelia*, 3 sequences; *M. deione*, 2 sequences; *M. caucasogenita/athalia*, 1 sequence. All 71 COI sequences are publicly available in DS-MELITAEA on BOLD ([dx.doi.org/10.5883/DS-MELITAEA](https://dx.doi.org/10.5883/DS-MELITAEA)) at <https://www.boldsystems.org/>. It should be noted that *M. caucasogenita* is morphologically very similar to *M. athalia* and the distributions of the two taxa apparently overlap in the Caucasus (5). Because our specimen originates from the Caucasus, we tentatively called it *M. caucasogenita/athalia*. In our opinion, the evolutionary history of *M. caucasogenita* and its relationship with *M. athalia* requires further research.

In order to inspect the distribution of mtDNA lineages over the Palearctic, we added sequences of *M. athalia* and *M. celadussa* available in public repositories (BOLD, GenBank) thus obtaining a total dataset of 418 COI (Table S5). To visualize the genetic differentiation pattern over space, we calculated a p-distance dissimilarity matrix for COI and projected it in two dimensions by Principal Coordinate Analysis (PCoA) using the “cmdscale” R function. The resulting configuration for specimens was projected in the RGB colour space using the recluster R package (6) and individual RGB colours obtained by specimens were plotted on a map using pie charts.

### (b) Morphological data

Genitalia morphometrics were performed for 42 male specimens of *M. athalia* and *M. celadussa* for which the abdomen was available to us. The genitalia were prepared following standard protocols (7). The distal part of the abdomen was placed into a 10% KOH solution and heated at 92 °C for 10 minutes. The abdomen was then placed in a petri dish and using a brush and forceps, the genitalia were isolated and cleaned, and were mounted on slides using Euparal. The genitalia were photographed in ventral view with a Leica DM1000 microscope and integrated Leica DF295 digital camera. Two to four photographs (depending on the quality of each sample) were stacked into single images using Zerene Stacker ([zerenesystems.com/cms/home](http://zerenesystems.com/cms/home)).

The genitalia terminology follows Higgins (8). Three elements of the male genitalia were measured (as in Figure S2) from stacked digital photographs using the software AxioVision 4.9.1: i) length of the sub-unci; ii) length of the posterior process of the valva; iii), the bifurcation on the posterior process of the valva, assessed based on four ordered values (0, absent; 1, small; 2, medium; 3, large) (Figure S2). We applied a Principal component analysis to the three variables by using the “dudi.mix” function of the ade4 R package (9) allowing the inclusion of continuous and ordered variables. To inspect the distribution of morphotypes and facilitate a direct comparison of the patterns among markers, we eliminated the effect of location and rotation between the bidimensional representations of COI PCoA and genitalia PCA with procrustes analysis, using the “recluster.procrustes” function of the recluster R package (6), which maximizes similarities among configurations on the basis of partially overlapping data sets. After procrustes, the bidimensional configuration for genitalia was projected in the RGB colour space and mapped as done for COI (see above).

#### (c) ddRAD library preparation

Genomic DNA was extracted using approximately two thirds of the thorax of either ethanol preserved or dry specimens. DNA extraction was done using the QIAGEN DNeasy Blood and Tissue kit following the manufacturer’s protocol. DNA extracts were gel-quantified visually in agarose 1% using the New England Biolabs 100 bp DNA Ladder (NEB). Due to the relatively low quality of initial genomic DNA, samples were subjected to whole genome amplification (WGA) following the instructions for 5 µl of template genomic DNA of REPLI-g® Mini Kits (QIAGEN). Afterwards, the concentration of amplified genomic DNA was quantified using the Quanti-iT Picogreen dsDNA reagents and kit (P7589, Invitrogen). The ddRAD tag

library was generated according to the same protocol described in Lee et al (10). Briefly, genomic DNA was double digested using the restriction enzyme pairs *Pst*I and *Mse*I and ligated to barcoded P1 and indexed P2 adapters, binding to *Pst*I and *Mse*I overhangs, respectively. DNA libraries were quantified using the High-Sensitivity DNA Analysis Kit in a 2100 Bioanalyzer (Agilent Technologies). The pooled library was sent for sequencing on an Illumina HiSeq 2500 PE 100 machine at FIMM (Institute for Molecular Medicine Finland). All obtained sequences are available at the NCBI Sequence Read Archive (SRA) [BioProject ID: PRJNA638526].

Table S1. *Melitaea* specimens used in this study.

| Sample ID        | BioSample accessions | Taxon                                    | Country  | Exact site                                        | Lat     | Lon     |
|------------------|----------------------|------------------------------------------|----------|---------------------------------------------------|---------|---------|
| RVcoll07E394     | SAMN15196501         | <i>M. athalia</i>                        | Romania  | Picior de Munte                                   | 44.8120 | 25.397  |
| RVcoll08M346     | SAMN15196502         | <i>M. athalia</i>                        | Romania  | 1 Km E of Gheorgheni                              | 46.743  | 25.664  |
| RVcoll10A789     | SAMN15196503         | <i>M. athalia</i>                        | Estonia  | 2 km S. of Karilatsi, Polva County                | 58.1072 | 26.9178 |
| RVcoll12Z197     | SAMN15196504         | <i>M. athalia</i>                        | Sweden   | Riala, Norrtaelje municipality                    | 59.612  | 18.485  |
| RVcoll13U296     | SAMN15196505         | <i>M. athalia</i>                        | Italy    | Val d'Oten                                        | 46.482  | 12.315  |
| RVcoll13U438     | SAMN15196506         | <i>M. athalia</i>                        | Italy    | Collina                                           | 46.589  | 12.853  |
| RVcoll14B773     | SAMN15196507         | <i>M. athalia</i>                        | Albania  | Voskopoje                                         | 40.592  | 20.596  |
| RVcoll14D059     | SAMN15196508         | <i>M. athalia</i>                        | Bulgaria | Pamporovo, hotel Elitsa                           | 41.624  | 24.701  |
| RVcoll14E853     | SAMN15196509         | <i>M. athalia</i>                        | Serbia   | Majdanpek, Debeli Lug                             | 44.361  | 21.892  |
| RVcoll14E859     | SAMN15196510         | <i>M. athalia</i>                        | Serbia   | Majdanpek, Debeli Lug                             | 44.361  | 21.892  |
| RVcoll14E904     | SAMN15196511         | <i>M. athalia</i>                        | Serbia   | Povlen Mt., near Pasna Ravan                      | 44.156  | 19.693  |
| RVcoll14F303     | SAMN15196512         | <i>M. athalia</i>                        | Serbia   | Crni Vrh                                          | 43.392  | 22.612  |
| RVcoll14F407     | SAMN15196513         | <i>M. athalia</i>                        | Bulgaria | Zemen, above the gorges                           | 42.49   | 22.733  |
| RVcoll14F538     | SAMN15196514         | <i>M. athalia</i>                        | Greece   | Orvilos Mt.                                       | 41.371  | 23.633  |
| RVcoll14F650     | SAMN15196515         | <i>M. athalia</i>                        | Greece   | Pentalofos-Eptachori                              | 40.205  | 21.064  |
| RVcoll14F666     | SAMN15196516         | <i>M. athalia</i>                        | Greece   | Pentalofos-Eptachori                              | 40.205  | 21.064  |
| RVcoll14G434     | SAMN15196517         | <i>M. athalia</i>                        | Greece   | Agios Germanos                                    | 40.864  | 21.201  |
| RVcoll14V075     | SAMN15196518         | <i>M. athalia</i>                        | Ukraine  | Fedorovka, Novaya Vodolaga distr.                 | 49.817  | 35.75   |
| RVcoll15I360     | SAMN15196519         | <i>M. athalia</i>                        | Austria  | Kohlmaier Hütte                                   | 46.8686 | 13.4262 |
| RVcoll15P033     | SAMN15196520         | <i>M. athalia</i>                        | Ukraine  | Korostyshiv                                       | 50.31   | 29.11   |
| RVcoll16H415     | SAMN15196521         | <i>M. athalia</i>                        | Sweden   | NW of Nikkaluokta (Cievrragorsa river valley)     | 67.8788 | 18.9024 |
| RVcoll16I052     | SAMN15196522         | <i>M. athalia</i>                        | Poland   | Siekierki                                         | 52.819  | 14.2346 |
| RVcoll16J000     | SAMN15196523         | <i>M. athalia</i>                        | Slovakia | Plesivec                                          | 48.6139 | 20.4172 |
| RVcoll16J612     | SAMN15196524         | <i>M. athalia</i>                        | Russia   | Krasnolesye, Nesterovskiy rayon                   | 54.3856 | 22.3677 |
| RVcoll11Y077     | SAMN15196525         | <i>M. aurelia</i>                        | Italy    | Pont d'Ael                                        | 44.436  | 8.402   |
| RVcoll12R765     | SAMN15196526         | <i>M. aurelia</i>                        | Romania  | Calarasi, padurea Ciornohal                       | 47.620  | 27.230  |
| RVcoll15H019     | SAMN15196527         | <i>M. aurelia</i>                        | Italy    | Dego                                              | 45.678  | 7.221   |
| RVcoll08M100     | SAMN15196528         | <i>M. britomatrix</i>                    | Romania  | Moldavia, Oraseni Vale (forest)                   | 47.667  | 26.650  |
| RVcoll14E766     | SAMN15196529         | <i>M. britomatrix</i>                    | Romania  | Capalnas                                          | 45.951  | 22.212  |
| RVcoll14N369     | SAMN15196530         | <i>M. britomatrix</i>                    | Ukraine  | Nosivka district, Chernihiv region                | 50.980  | 31.780  |
| RVcoll14V076     | SAMN15196531         | <i>M. britomatrix</i>                    | Ukraine  | Fedorovka, Novaya Vodolaga distr.                 | 49.817  | 35.750  |
| ZFMK-TIS-8000434 | SAMN15196532         | <i>M. caucasogenita</i> / <i>athalia</i> | Georgia  | Samtskhe-Javakheti, Borjomi, 0.65km V of Kodiani, |         |         |
| RVcoll08H935     | SAMN15196533         | <i>M. celadussa</i>                      | Spain    | Hervas, Carretera Hervas-La Garganta              | 40.3240 | -5.807  |

|                     |              |                     |             |                                                       |         |         |
|---------------------|--------------|---------------------|-------------|-------------------------------------------------------|---------|---------|
| <b>RVcoll08J851</b> | SAMN15196534 | <i>M. celadussa</i> | Spain       | Posada de Valdeon                                     | 43.154  | -4.92   |
| <b>RVcoll08L852</b> | SAMN15196535 | <i>M. celadussa</i> | Spain       | Puerto de la Morcuera                                 | 40.878  | -3.848  |
| <b>RVcoll08M074</b> | SAMN15196536 | <i>M. celadussa</i> | Spain       | San Andres del Rey, La Alcarria                       | 40.643  | -2.814  |
| <b>RVcoll08M915</b> | SAMN15196537 | <i>M. celadussa</i> | Spain       | Bassa d'Arres, Vall d'Aran                            | 42.765  | 0.712   |
| <b>RVcoll08P221</b> | SAMN15196538 | <i>M. celadussa</i> | Spain       | La Molina                                             | 42.354  | 1.951   |
| <b>RVcoll11H561</b> | SAMN15196539 | <i>M. celadussa</i> | Italy       | San Martino alle Scale, Sicily                        | 38.0950 | 13.2490 |
| <b>RVcoll11H741</b> | SAMN15196540 | <i>M. celadussa</i> | Italy       | Portella Femmina Morta                                | 37.92   | 14.66   |
| <b>RVcoll11I433</b> | SAMN15196541 | <i>M. celadussa</i> | Spain       | 3 km S Gueejar Sierra (road to Veleta, Sierra Nevada) | 37.131  | -3.447  |
| <b>RVcoll11I507</b> | SAMN15196542 | <i>M. celadussa</i> | Spain       | SE of Cumbres Verdes (La Zubia)                       | 37.083  | -3.51   |
| <b>RVcoll11I949</b> | SAMN15196543 | <i>M. celadussa</i> | France      | Chichilianne                                          | 44.81   | 5.585   |
| <b>RVcoll12O623</b> | SAMN15196544 | <i>M. celadussa</i> | France      | Isola                                                 | 44.201  | 7.074   |
| <b>RVcoll12P926</b> | SAMN15196545 | <i>M. celadussa</i> | France      | Nans-les-Pins                                         | 43.352  | 5.826   |
| <b>RVcoll12Q105</b> | SAMN15196546 | <i>M. celadussa</i> | France      | Callas                                                | 43.569  | 6.566   |
| <b>RVcoll12Q106</b> | SAMN15196547 | <i>M. celadussa</i> | France      | Callas                                                | 43.569  | 6.566   |
| <b>RVcoll13S845</b> | SAMN15196548 | <i>M. celadussa</i> | Portugal    | East of Manteigas                                     | 40.389  | -7.534  |
| <b>RVcoll13U092</b> | SAMN15196549 | <i>M. celadussa</i> | Italy       | Monte Terminillo                                      | 42.46   | 12.937  |
| <b>RVcoll13U124</b> | SAMN15196550 | <i>M. athalia</i>   | Italy       | Borgo Olivi                                           | 46.024  | 12.28   |
| <b>RVcoll14E220</b> | SAMN15196551 | <i>M. celadussa</i> | Spain       | Cabanas al Nacimiento del Guadalquivir                | 37.767  | -2.999  |
| <b>RVcoll14J820</b> | SAMN15196552 | <i>M. celadussa</i> | France      | Belmont-sur-Rance                                     | 43.782  | 2.727   |
| <b>RVcoll14L240</b> | SAMN15196553 | <i>M. celadussa</i> | Italy       | Campo Carlo Magno, Malga Vigo                         | 46.263  | 10.836  |
| <b>RVcoll15A654</b> | SAMN15196554 | <i>M. celadussa</i> | Italy       | Lodi                                                  | 45.328  | 9.509   |
| <b>RVcoll15A916</b> | SAMN15196555 | <i>M. celadussa</i> | Italy       | Campo nell Elba, Monumento                            | 42.76   | 10.27   |
| <b>RVcoll15G145</b> | SAMN15196556 | <i>M. celadussa</i> | France      | Septmoncel                                            | 46.3654 | 5.8983  |
| <b>RVcoll15G841</b> | SAMN15196557 | <i>M. celadussa</i> | Italy       | Ausone                                                | 46.2936 | 8.27976 |
| <b>RVcoll15I495</b> | SAMN15196558 | <i>M. celadussa</i> | Austria     | Wacht (Drau River)                                    | 46.7890 | 12.8747 |
| <b>RVcoll15L146</b> | SAMN15196559 | <i>M. celadussa</i> | Italy       | Santa Caterina Valfurva                               | 46.4240 | 10.4640 |
| <b>RVcoll15M133</b> | SAMN15196560 | <i>M. celadussa</i> | France      | Les Granges du Poizat                                 | 46.116  | 5.628   |
| <b>RVcoll15N014</b> | SAMN15196561 | <i>M. celadussa</i> | Italy       | Alberona                                              | 41.449  | 15.112  |
| <b>RVcoll16C754</b> | SAMN15196562 | <i>M. celadussa</i> | Italy       | Valbonella                                            | 43.924  | 11.792  |
| <b>MAT-LU-K-122</b> | SAMN15196563 | <i>M. celadussa</i> | Switzerland | Grüebli                                               | 47.0155 | 8.2525  |
| <b>MAT-SG-W-135</b> | SAMN15196564 | <i>M. celadussa</i> | Switzerland | Horbrunne                                             | 47.2075 | 9.3882  |
| <b>MAT-SG-W-137</b> | SAMN15196565 | <i>M. celadussa</i> | Switzerland | Horbrunne                                             | 47.2075 | 9.3882  |
| <b>MAT-SG-W-138</b> | SAMN15196566 | <i>M. celadussa</i> | Switzerland | Horbrunne                                             | 47.2075 | 9.3882  |
| <b>MAT-SG-W-140</b> | SAMN15196567 | <i>M. celadussa</i> | Switzerland | Horbrunne                                             | 47.2075 | 9.3882  |
| <b>MAT-SG-W-144</b> | SAMN15196568 | <i>M. athalia</i>   | Switzerland | Horbrunne                                             | 47.2075 | 9.3882  |
| <b>MAT-UR-I-146</b> | SAMN15196569 | <i>M. celadussa</i> | Switzerland | Stettli                                               | 46.9072 | 8.5198  |
| <b>RVcoll06A041</b> | SAMN15196570 | <i>M. deione</i>    | Spain       | Vilamos, Vall d'Aran                                  | 36.9100 | -3.2020 |
| <b>RVcoll08M932</b> | SAMN15196571 | <i>M. deione</i>    | Spain       | Barranco de los Lagartos, Cadiar                      | 42.7430 | 0.7410  |

Table S2. Measurements of diagnostic male genitalia features in *M. athalia*-*M. celadussa*. Specimens were attributed to species based on both COI and morphology. The bifurcation of the posterior process of valva has been classified in four ordered categories (0, no bifurcation; 1, 2, 3, small, medium and large bifurcation, respectively).

| Sample ID    | Taxon (based on COI) | Taxon (based on genitalia) | Sub-unci (mm) | Posterior process of valva (mm) | Bifurcation of the posterior process of valva |
|--------------|----------------------|----------------------------|---------------|---------------------------------|-----------------------------------------------|
| RVcoll08H935 | <i>M. celadussa</i>  | <i>M. celadussa</i>        | 0.00          | 0.79                            | no                                            |
| RVcoll11H741 | <i>M. celadussa</i>  | <i>M. celadussa</i>        | 0.00          | 0.68                            | no                                            |
| RVcoll11H561 | <i>M. celadussa</i>  | <i>M. celadussa</i>        | 0.00          | 0.69                            | no                                            |
| RVcoll08M074 | <i>M. celadussa</i>  | <i>M. celadussa</i>        | 0.00          | 0.68                            | no                                            |
| RVcoll15A654 | <i>M. celadussa</i>  | <i>M. celadussa</i>        | 0.00          | 0.72                            | no                                            |
| RVcoll14E220 | <i>M. celadussa</i>  | <i>M. celadussa</i>        | 0.00          | 0.72                            | no                                            |
| RVcoll12Q106 | <i>M. celadussa</i>  | <i>M. celadussa</i>        | 0.00          | 0.62                            | no                                            |
| RVcoll12Q105 | <i>M. celadussa</i>  | <i>M. celadussa</i>        | 0.00          | 0.64                            | no                                            |
| RVcoll12P926 | <i>M. celadussa</i>  | <i>M. celadussa</i>        | 0.00          | 0.65                            | no                                            |
| RVcoll16C754 | <i>M. celadussa</i>  | <i>M. celadussa</i>        | 0.00          | 0.69                            | no                                            |
| RVcoll15N014 | <i>M. celadussa</i>  | <i>M. celadussa</i>        | 0.00          | 0.65                            | no                                            |
| RVcoll15G841 | <i>M. celadussa</i>  | <i>M. celadussa</i>        | 0.00          | 0.64                            | no                                            |
| RVcoll15A916 | <i>M. celadussa</i>  | <i>M. celadussa</i>        | 0.00          | 0.77                            | no                                            |
| RVcoll08L852 | <i>M. celadussa</i>  | <i>M. celadussa</i>        | 0.03          | 0.64                            | no                                            |
| RVcoll08M915 | <i>M. celadussa</i>  | <i>M. celadussa</i>        | 0.04          | 0.67                            | no                                            |
| RVcoll13U092 | <i>M. celadussa</i>  | <i>M. celadussa</i>        | 0.08          | 0.65                            | no                                            |
| RVcoll15G145 | <i>M. celadussa</i>  | intermediate               | 0.13          | 0.68                            | no                                            |
| MAT-SG-W-138 | <i>M. celadussa</i>  | intermediate               | 0.13          | 0.62                            | yes, small                                    |
| RVcoll08P221 | <i>M. celadussa</i>  | intermediate               | 0.15          | 0.78                            | no                                            |
| RVcoll11I949 | <i>M. celadussa</i>  | intermediate               | 0.19          | 0.67                            | no                                            |
| MAT-LU-K-122 | <i>M. celadussa</i>  | intermediate               | 0.20          | 0.65                            | no                                            |
| MAT-UR-I-146 | <i>M. celadussa</i>  | intermediate               | 0.21          | 0.67                            | no                                            |
| RVcoll14F303 | <i>M. athalia</i>    | <i>M. athalia</i>          | 0.26          | 0.60                            | yes, large                                    |
| MAT-SG-W-135 | <i>M. celadussa</i>  | <i>M. athalia</i>          | 0.26          | 0.63                            | yes, medium                                   |
| MAT-SG-W-140 | <i>M. celadussa</i>  | <i>M. athalia</i>          | 0.27          | 0.65                            | yes, small                                    |
| RVcoll16I052 | <i>M. athalia</i>    | <i>M. athalia</i>          | 0.28          | 0.52                            | yes, medium                                   |
| RVcoll16H415 | <i>M. athalia</i>    | <i>M. athalia</i>          | 0.28          | 0.52                            | yes, large                                    |
| RVcoll14F666 | Balkan               | <i>M. athalia</i>          | 0.28          | 0.45                            | yes, large                                    |
| RVcoll16J000 | <i>M. athalia</i>    | <i>M. athalia</i>          | 0.29          | 0.53                            | yes, large                                    |
| RVcoll14F650 | Balkan               | <i>M. athalia</i>          | 0.29          | 0.57                            | yes, small                                    |
| RVcoll15I360 | <i>M. athalia</i>    | <i>M. athalia</i>          | 0.30          | 0.60                            | yes, large                                    |
| RVcoll14V075 | <i>M. athalia</i>    | <i>M. athalia</i>          | 0.31          | 0.59                            | yes, large                                    |
| RVcoll12Z197 | <i>M. athalia</i>    | <i>M. athalia</i>          | 0.32          | 0.46                            | yes, large                                    |
| RVcoll14E859 | Balkan               | <i>M. athalia</i>          | 0.32          | 0.52                            | yes, large                                    |
| MAT-SG-W-137 | <i>M. celadussa</i>  | <i>M. athalia</i>          | 0.32          | 0.58                            | yes, medium                                   |
| RVcoll10A789 | <i>M. athalia</i>    | <i>M. athalia</i>          | 0.34          | 0.59                            | yes, large                                    |
| MAT-SG-W-144 | <i>M. celadussa</i>  | <i>M. athalia</i>          | 0.34          | 0.64                            | yes, large                                    |
| RVcoll14F538 | <i>M. athalia</i>    | <i>M. athalia</i>          | 0.34          | 0.68                            | yes, large                                    |
| RVcoll13U438 | <i>M. athalia</i>    | <i>M. athalia</i>          | 0.35          | 0.56                            | yes, medium                                   |

|                     |                     |                   |      |      |            |
|---------------------|---------------------|-------------------|------|------|------------|
| <b>RVcoll14L240</b> | <i>M. celadussa</i> | <i>M. athalia</i> | 0.36 | 0.74 | yes, small |
| <b>RVcoll13U124</b> | <i>M. celadussa</i> | <i>M. athalia</i> | 0.37 | 0.77 | yes, small |
| <b>RVcoll13U296</b> | <i>M. athalia</i>   | <i>M. athalia</i> | 0.41 | 0.73 | yes, large |

Table S3. Summary statistics of ddRAD analysis in *M. athalia*–*M. celadussa* using the reference assembly method in ipyrad-0.9.31.

| Sample ID        | Raw reads | Reads passed filter | Clusters at 85% | Loci retained in assembly | Sample coverage (%) |
|------------------|-----------|---------------------|-----------------|---------------------------|---------------------|
| RVcoll07E394     | 4673782   | 4673359             | 14500           | 4180                      | 11.14               |
| RVcoll08M346     | 1180105   | 1180010             | 21709           | 5737                      | 15.30               |
| RVcoll10A789     | 1362089   | 1361958             | 18140           | 5075                      | 13.53               |
| RVcoll12Z197     | 3428846   | 3428520             | 26985           | 7994                      | 21.31               |
| RVcoll13U296     | 2349154   | 2348944             | 16355           | 5609                      | 14.95               |
| RVcoll13U438     | 1794097   | 1793939             | 12193           | 3557                      | 9.48                |
| RVcoll14B773     | 1334180   | 1334062             | 22537           | 5597                      | 14.92               |
| RVcoll14D059     | 2904690   | 2904422             | 22346           | 5568                      | 14.85               |
| RVcoll14E853     | 1735363   | 1735214             | 16089           | 4763                      | 12.70               |
| RVcoll14E859     | 1336558   | 1336439             | 14023           | 4374                      | 11.66               |
| RVcoll14E904     | 312335    | 312305              | 11555           | 3538                      | 9.43                |
| RVcoll14F303     | 514177    | 514133              | 11188           | 3875                      | 10.33               |
| RVcoll14F407     | 526337    | 526291              | 12533           | 3256                      | 8.68                |
| RVcoll14F538     | 1418876   | 1418752             | 16369           | 4439                      | 11.84               |
| RVcoll14F650     | 800953    | 800882              | 14182           | 3939                      | 10.50               |
| RVcoll14F666     | 899231    | 899141              | 14859           | 3352                      | 8.94                |
| RVcoll14G434     | 822465    | 822392              | 30231           | 5943                      | 15.85               |
| RVcoll14V075     | 2639967   | 2639743             | 24563           | 7873                      | 20.99               |
| RVcoll15I360     | 3447665   | 3447314             | 13995           | 4106                      | 10.95               |
| RVcoll15P033     | 2394804   | 2394573             | 21683           | 7043                      | 18.78               |
| RVcoll16H415     | 6631017   | 6630426             | 18917           | 6500                      | 17.33               |
| RVcoll16I052     | 1399866   | 1399738             | 18588           | 5416                      | 14.44               |
| RVcoll16J000     | 1669413   | 1669269             | 18005           | 5315                      | 14.17               |
| RVcoll16J612     | 3478095   | 3477748             | 18272           | 5091                      | 13.57               |
| RVcoll15H019     | 2936423   | 2936146             | 22346           | 5093                      | 13.58               |
| RVcoll12R765     | 753456    | 753380              | 20325           | 4568                      | 12.18               |
| RVcoll11Y077     | 3364094   | 3363784             | 18608           | 4633                      | 12.35               |
| RVcoll08M100     | 814284    | 814187              | 19502           | 4749                      | 12.66               |
| RVcoll14E766     | 1920916   | 1920734             | 14033           | 4000                      | 10.66               |
| RVcoll14N369     | 708815    | 708744              | 13768           | 3456                      | 9.21                |
| RVcoll14V076     | 1953329   | 1953126             | 18872           | 4978                      | 13.27               |
| ZFMK-TIS-8000434 | 2035030   | 2034813             | 20384           | 4745                      | 12.65               |
| RVcoll08H935     | 678809    | 678752              | 12296           | 2681                      | 7.15                |
| RVcoll08J851     | 2139413   | 2139191             | 18332           | 5194                      | 13.85               |
| RVcoll08L852     | 1162267   | 1162161             | 20459           | 5205                      | 13.88               |
| RVcoll08M074     | 1233917   | 1233798             | 15949           | 4903                      | 13.07               |
| RVcoll08M915     | 1320091   | 1319987             | 28081           | 6346                      | 16.92               |
| RVcoll08P221     | 2362060   | 2361835             | 26702           | 6765                      | 18.04               |
| RVcoll11H561     | 912690    | 912613              | 13419           | 3955                      | 10.54               |
| RVcoll11H741     | 2128167   | 2127974             | 16075           | 4558                      | 12.15               |
| RVcoll11I433     | 4085104   | 4084685             | 17209           | 4894                      | 13.05               |
| RVcoll11I507     | 1682980   | 1682848             | 13272           | 4070                      | 10.85               |

|              |         |         |       |      |       |
|--------------|---------|---------|-------|------|-------|
| RVcoll11I949 | 1087324 | 1087215 | 17448 | 5707 | 15.22 |
| RVcoll12O623 | 1844190 | 1844014 | 15066 | 4894 | 13.05 |
| RVcoll12P926 | 1807939 | 1807757 | 17564 | 4403 | 11.74 |
| RVcoll12Q105 | 1903944 | 1903771 | 15983 | 4940 | 13.17 |
| RVcoll12Q106 | 782535  | 782461  | 14671 | 4191 | 11.17 |
| RVcoll13S845 | 4178603 | 4178173 | 15961 | 3919 | 10.45 |
| RVcoll13U092 | 2365351 | 2365119 | 16590 | 3899 | 10.40 |
| RVcoll13U124 | 1047273 | 1047162 | 14570 | 4658 | 12.42 |
| RVcoll14E220 | 5057710 | 5057299 | 10992 | 2454 | 6.54  |
| RVcoll14J820 | 2919802 | 2919525 | 23287 | 6539 | 17.43 |
| RVcoll14L240 | 2293920 | 2293724 | 17637 | 5047 | 13.46 |
| RVcoll15A654 | 684166  | 684105  | 12276 | 2336 | 6.23  |
| RVcoll15A916 | 442919  | 442886  | 14948 | 2934 | 7.82  |
| RVcoll15G145 | 1099739 | 1099637 | 16438 | 4704 | 12.54 |
| RVcoll15G841 | 971153  | 971078  | 26138 | 6134 | 16.35 |
| RVcoll15I495 | 1365715 | 1365567 | 14571 | 4710 | 12.56 |
| RVcoll15L146 | 273904  | 273881  | 14653 | 3820 | 10.18 |
| Rvcoll15M133 | 2963178 | 2962880 | 21183 | 5808 | 15.49 |
| RVcoll15N014 | 2912245 | 2911962 | 24242 | 5083 | 13.55 |
| RVcoll16C754 | 818903  | 818831  | 21637 | 5107 | 13.62 |
| MAT-LU-K-122 | 1511382 | 1511226 | 29260 | 7416 | 19.77 |
| MAT-SG-W-135 | 1630628 | 1630488 | 32584 | 8032 | 21.41 |
| MAT-SG-W-137 | 863921  | 863860  | 21263 | 5749 | 15.33 |
| MAT-SG-W-138 | 1308911 | 1308809 | 13360 | 3914 | 10.44 |
| MAT-SG-W-140 | 489972  | 489925  | 11706 | 3800 | 10.13 |
| MAT-SG-W-144 | 2207497 | 2207274 | 33001 | 9051 | 24.13 |
| MAT-UR-I-146 | 1481659 | 1481541 | 22100 | 5116 | 13.64 |
| RVcoll08M932 | 1254596 | 1254478 | 22563 | 4917 | 13.11 |
| RVcoll06A041 | 3118650 | 3118338 | 11197 | 3091 | 8.24  |

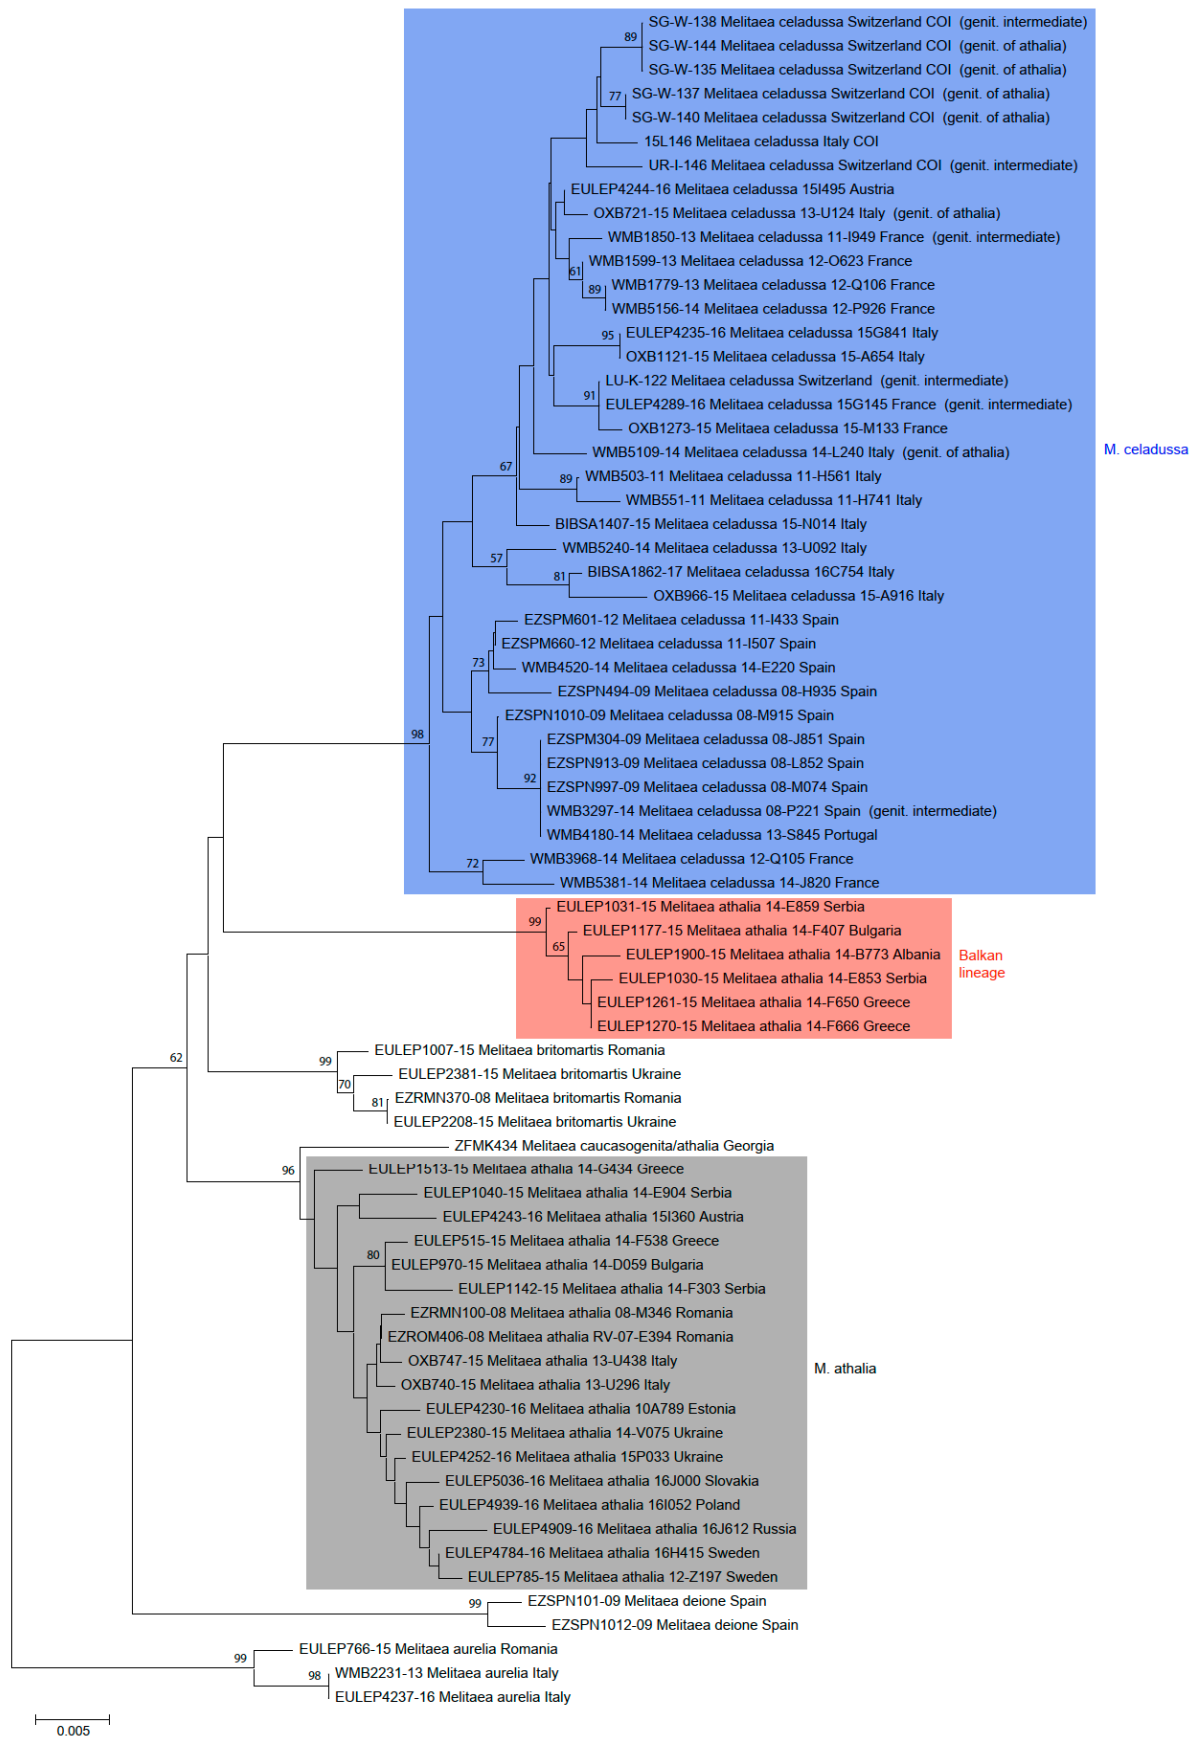

Figure S1. Neighbor joining tree based on COI of specimens used in this study. Bootstrap supports (> 50) are indicated next to recovered nodes.

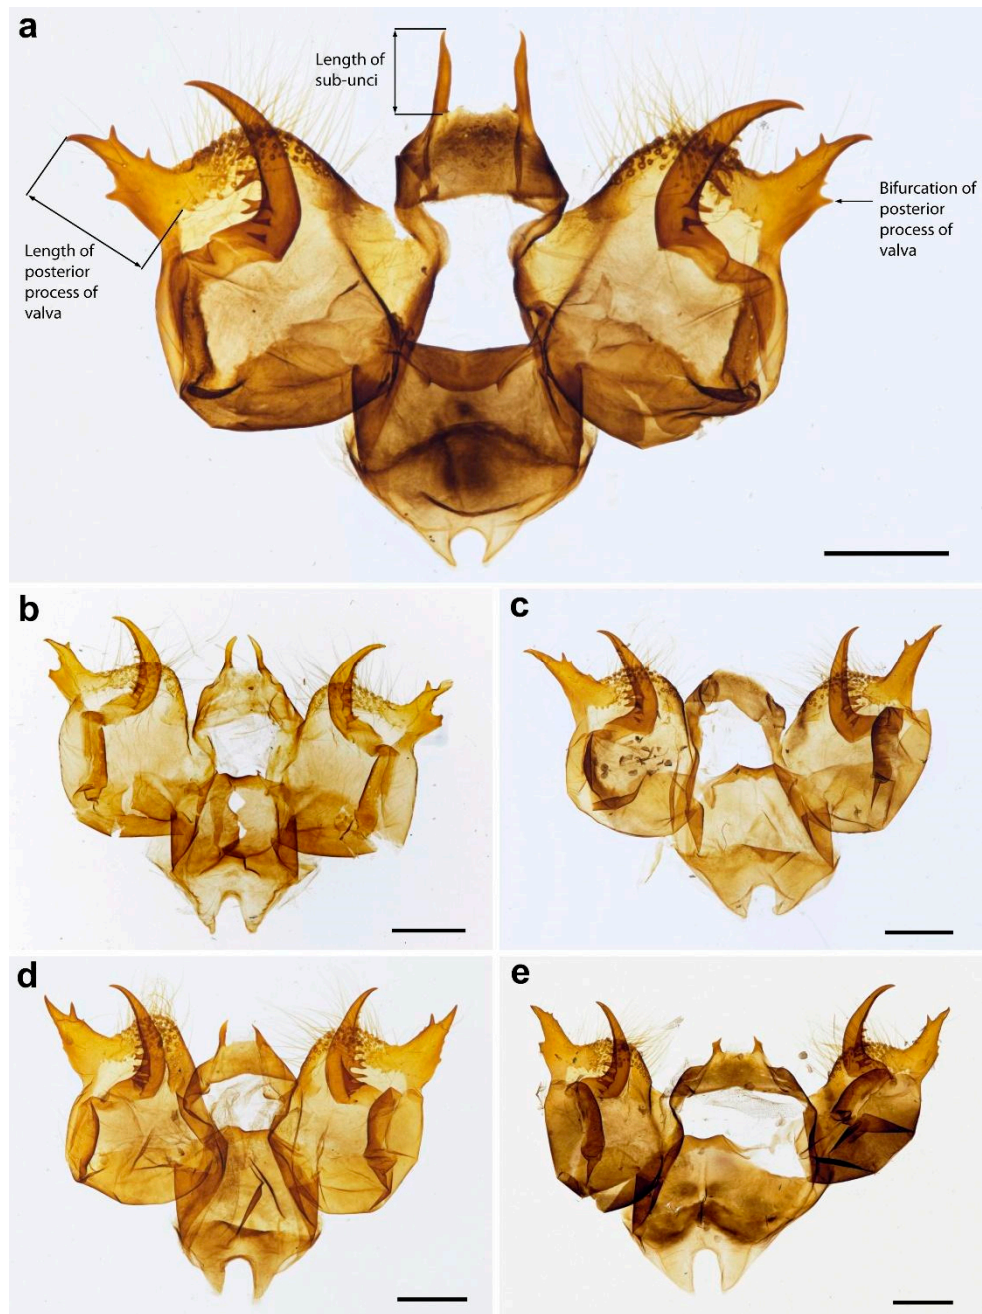

Figure S2. Examples of male genitalia of *Melitaea athalia* and *M. celadussa*. **a.** *M. athalia*, RVcoll13U438, Italy. Measured/assessed elements of the genitalia are indicated; **b.** *M. athalia* (Balkan lineage), RVcoll14F666, Greece; **c.** *M. celadussa*, RVcoll15N014, Italy; **d.** Specimen with intermediate characters between *M. athalia* and *M. celadussa*, LUK122, Switzerland; **e.** Specimen with intermediate characters between *M. athalia* and *M. celadussa*, SGW138, Switzerland. Scale bars represent 0.5 mm.

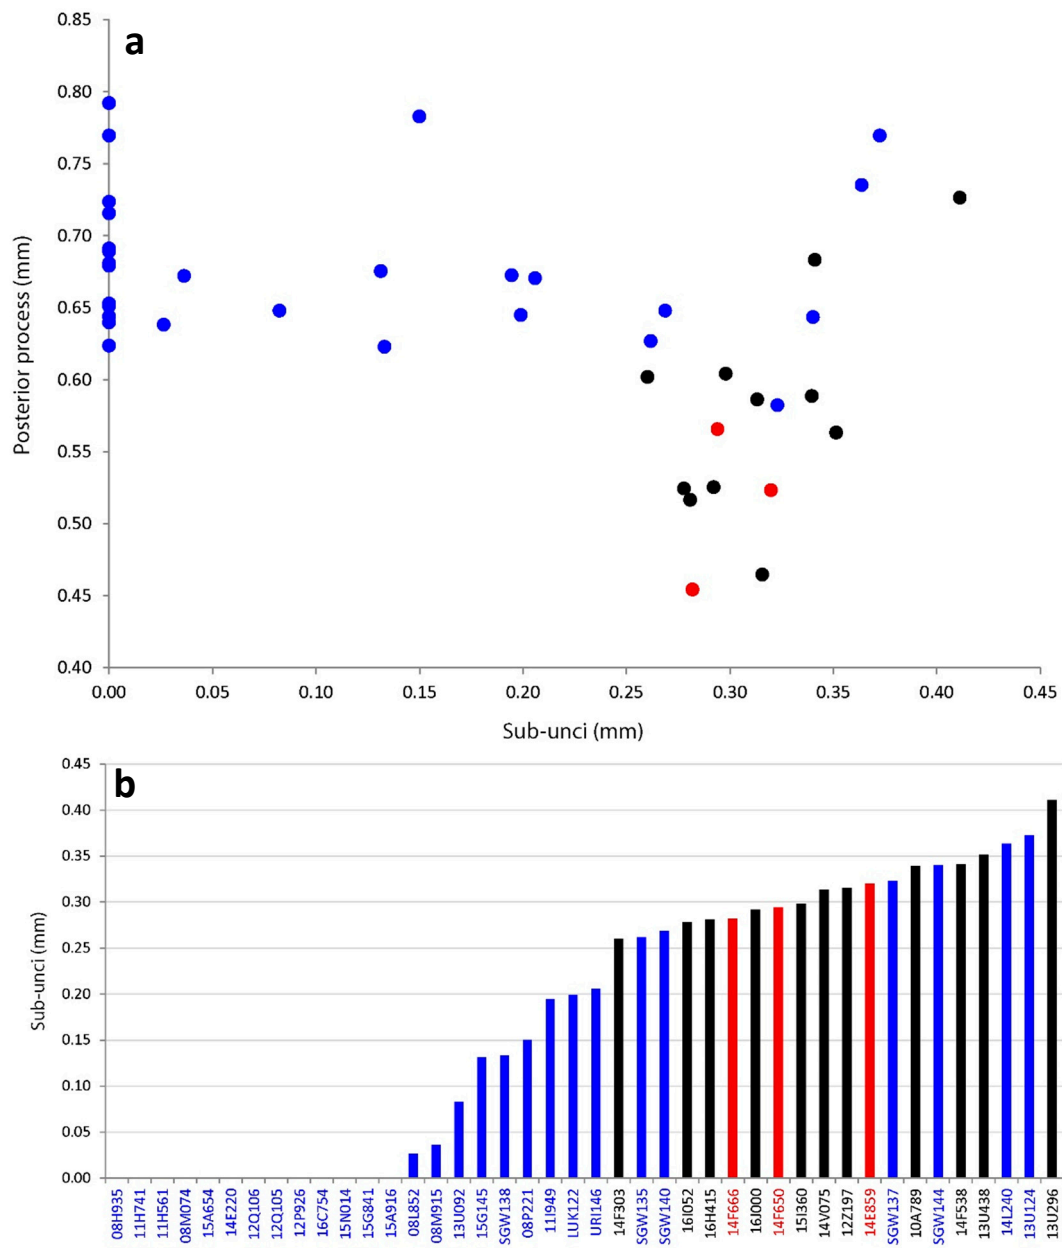

Figure S3. **a.** Scatterplot showing the relation between the length of sub-unci and the posterior process of valva in *M. athalia*-*M. celadussa*. **b.** Male genitalia measurements of sub-unci length. Black indicates *M. athalia*, blue indicates *M. celadussa* and red indicates specimens from the Balkan clade. Taxa are attributed based on COI.

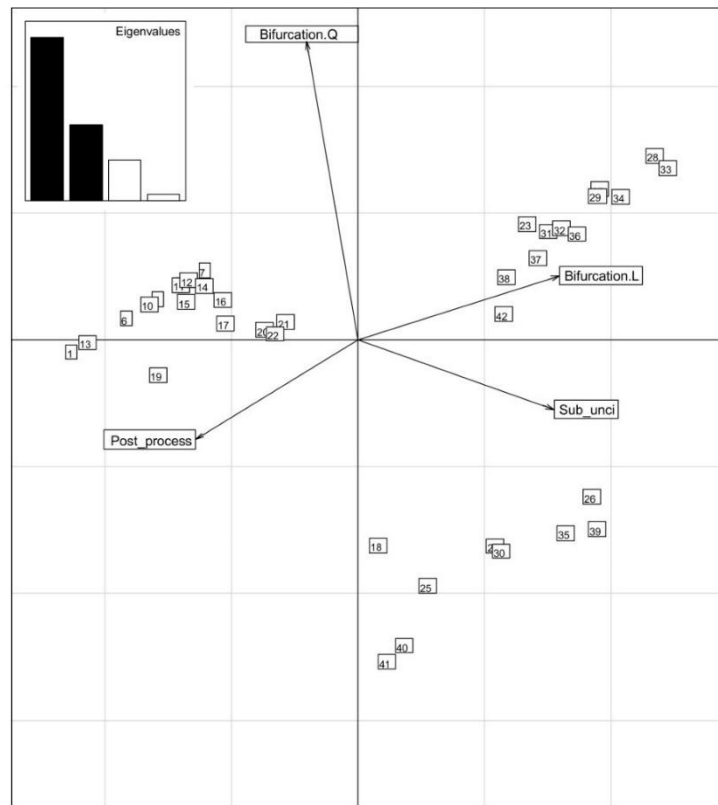

Figure S4. PCA biplot showing the distribution of specimens and variables. The *M. celadussa* morphotype is clustered in the left (no bifurcation and short sub-unci) and the *M. athalia* morphotype appears to the right (small, medium and large bifurcation, and long sub-unci).

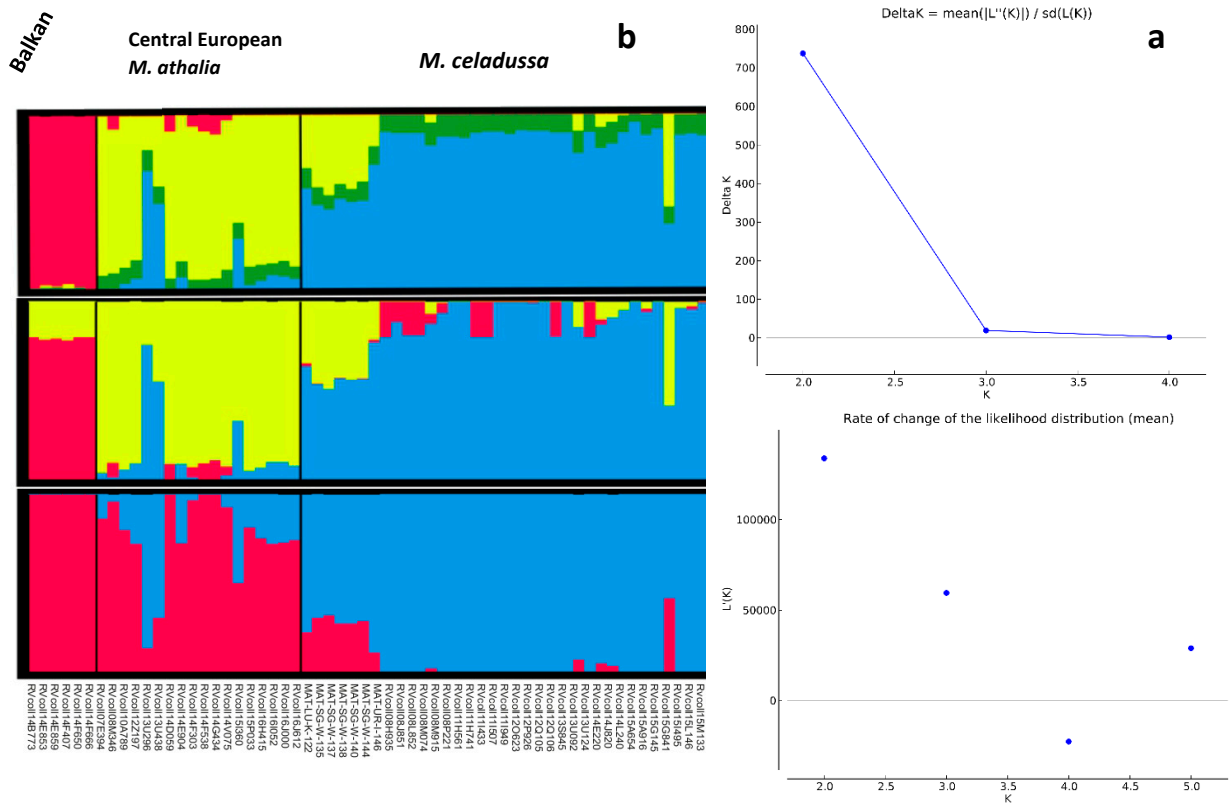

Figure S5. **a.** Genomic structural analysis of *M. athalia*-*M. celadussa* for  $\Delta K=5$  showing the maximum value at  $K=2$ . **b.** The aligned maps show cluster assignments at 2-4, from bottom to top.

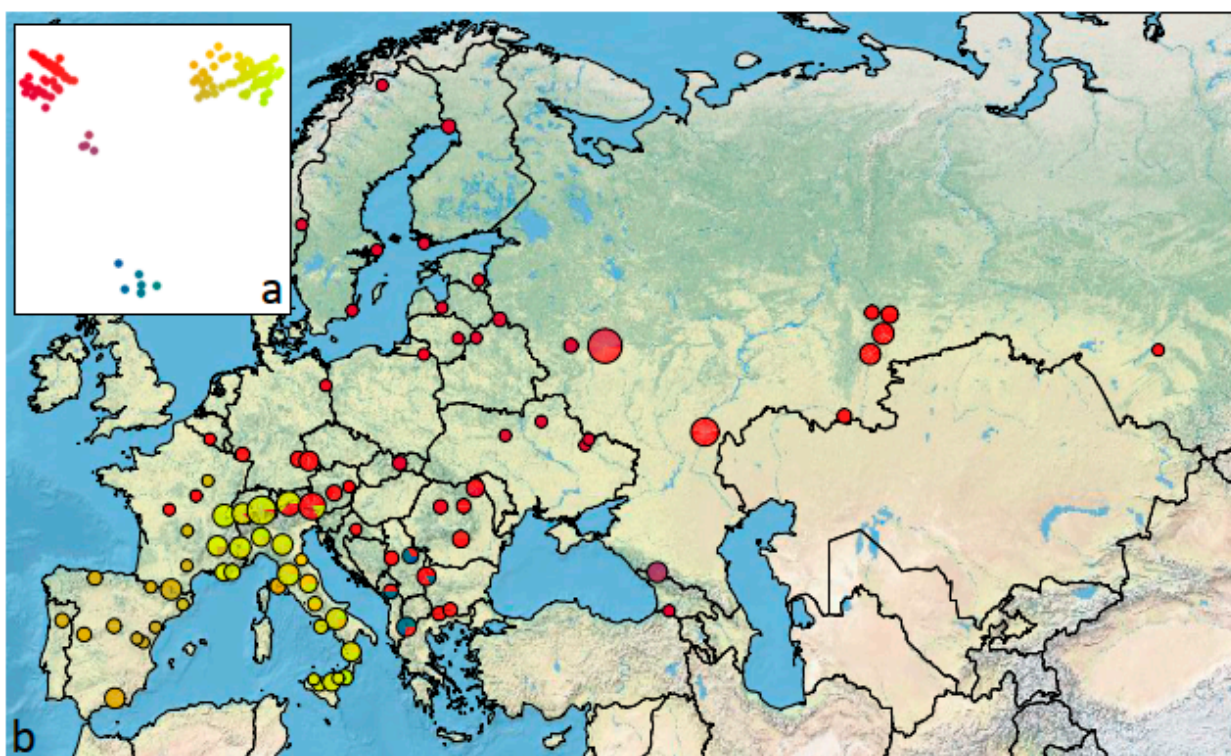

Figure S6. **a.** The configuration obtained after PCoA of COI distances projected in the RGB space and **b.** the location of each specimen on the map

Table S4. Posterior probability values of estimated parameters for the fittest scenario (sc3) by DIYABC v.2.1.0. based on 1% of the closest simulated data sets (scaled). N = effective population size, t = divergence time.

| Parameter | mean     | median   | mode     | 2.5% CI  | 97.5% CI |
|-----------|----------|----------|----------|----------|----------|
| <b>N1</b> | 8.45E-01 | 4.90E-01 | 4.16E-01 | 4.16E-01 | 2.69E+00 |
| <b>N2</b> | 3.09E-01 | 5.30E-03 | 4.06E-03 | 4.06E-03 | 1.96E+00 |
| <b>N3</b> | 8.72E-03 | 7.81E-03 | 7.81E-03 | 7.81E-03 | 7.81E-03 |
| <b>t1</b> | 2.51E-01 | 1.62E-01 | 5.36E-02 | 1.28E-02 | 1.26E+00 |
| <b>t2</b> | 1.55E-01 | 1.54E-01 | 1.54E-01 | 1.54E-01 | 1.54E-01 |

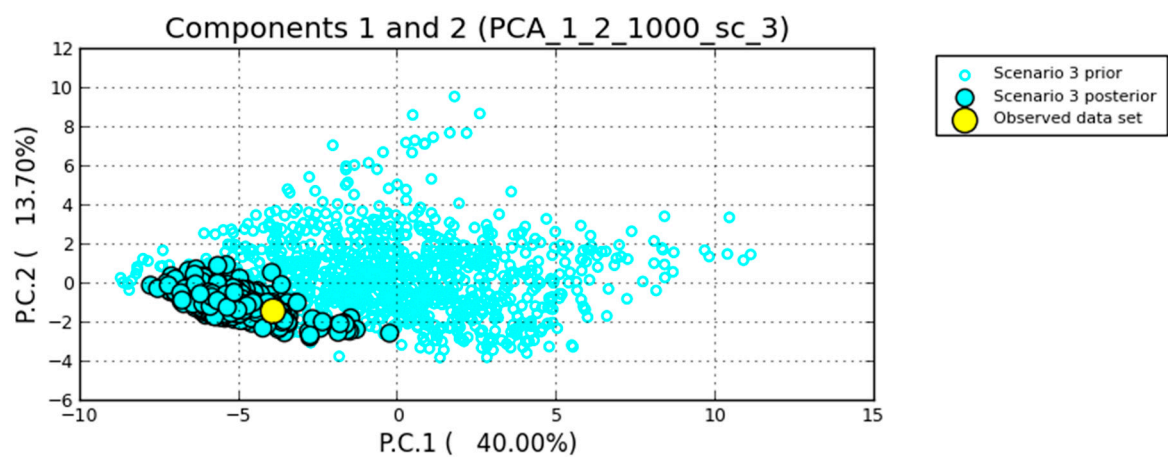

Figure S7. The principal component analyses (PCAs) of summary statistics were performed using DIYABC v.2.1.0 software for the prevailing admixture scenario based on the computer simulation of SNPs data.

Table S5. The specimens used for the COI analysis. Identifications are based on COI. Country of origin, decimal degrees coordinates, as well as BOLD and GenBank codes are indicated.

| Sample.ID       | Species                   | Country | Latitude | Longitude | BOLD ID      | Genbank code |
|-----------------|---------------------------|---------|----------|-----------|--------------|--------------|
| RVcoll09V134    | <i>Melitaea celadussa</i> | Spain   | 36.964   | -2.855    | EZSPC1423-10 | KP870439     |
| RVcoll09V135    | <i>Melitaea celadussa</i> | Spain   | 36.987   | -3.262    | EZSPC1424-10 | HM901538     |
| RVcoll09V136    | <i>Melitaea celadussa</i> | Spain   | 36.987   | -3.262    | EZSPC1425-10 | HM901539     |
| RVcoll09V137    | <i>Melitaea celadussa</i> | Spain   | 36.987   | -3.262    | EZSPC1426-10 | HM901540     |
| RVcoll11I507    | <i>Melitaea celadussa</i> | Spain   | 37.083   | -3.51     | EZSPM660-12  | KP870246     |
| RVcoll08J954    | <i>Melitaea celadussa</i> | Spain   | 37.107   | -3.392    | EZSPC1056-10 | HM901259     |
| RVcoll11I433    | <i>Melitaea celadussa</i> | Spain   | 37.131   | -3.447    | EZSPM601-12  | KP871044     |
| RVcoll14E220    | <i>Melitaea celadussa</i> | Spain   | 37.767   | -2.999    | WMB4520-14   | NA           |
| RVcoll11H980    | <i>Melitaea celadussa</i> | Italy   | 37.8     | 13.99     | BIBSA1747-16 | NA           |
| RVcoll11H749    | <i>Melitaea celadussa</i> | Italy   | 37.85    | 14.71     | WMB556-11    | NA           |
| RVcoll10C638    | <i>Melitaea celadussa</i> | Italy   | 37.868   | 13.384    | WMB2877-14   | NA           |
| RVcoll11H741    | <i>Melitaea celadussa</i> | Italy   | 37.92    | 14.66     | WMB551-11    | NA           |
| RVcoll12R009    | <i>Melitaea celadussa</i> | Italy   | 37.967   | 14.75     | WMB2575-13   | NA           |
| RVcoll11H561    | <i>Melitaea celadussa</i> | Italy   | 38.08    | 13.25     | WMB503-11    | NA           |
| RVcoll10C670    | <i>Melitaea celadussa</i> | Italy   | 38.084   | 15.834    | WMB2295-13   | NA           |
| RVcollLD0251    | <i>Melitaea celadussa</i> | Italy   | 38.135   | 15.285    | OXB1029-15   | NA           |
| RVcoll11I120    | <i>Melitaea celadussa</i> | Italy   | 38.201   | 15.98     | WMB3854-14   | NA           |
| RVcoll11I170    | <i>Melitaea celadussa</i> | Italy   | 38.24    | 15.71     | WMB3857-14   | NA           |
| RVcoll10C542    | <i>Melitaea celadussa</i> | Italy   | 38.372   | 16.236    | WMB2286-13   | NA           |
| LEPSS00382      | <i>Melitaea celadussa</i> | Italy   | 39.3881  | 16.5578   | BIBSA1554-16 | NA           |
| LEPSS00090      | <i>Melitaea celadussa</i> | Italy   | 39.3889  | 16.6022   | BIBSA090-14  | NA           |
| LEPSS00114      | <i>Melitaea celadussa</i> | Italy   | 39.3917  | 16.5303   | BIBSA494-15  | NA           |
| RVcoll11I247    | <i>Melitaea celadussa</i> | Italy   | 39.86    | 16.07     | BIBSA1744-16 | NA           |
| RVcoll220602AM3 | <i>Melitaea celadussa</i> | Spain   | 39.925   | -0.879    | EZSPC1273-10 | JN274545     |

|                  |                           |          |         |         |              |                     |
|------------------|---------------------------|----------|---------|---------|--------------|---------------------|
| RVcoll11I207     | <i>Melitaea celadussa</i> | Italy    | 39.93   | 16.15   | BIBSA679-15  | NA                  |
| RVcoll11I204     | <i>Melitaea celadussa</i> | Italy    | 39.94   | 16.15   | WMB651-11    | NA                  |
| RVcoll100908AW26 | <i>Melitaea celadussa</i> | Spain    | 40.126  | -1.432  | EZSPC1298-10 | HM901470            |
| GWORU094-10      | <i>Melitaea celadussa</i> | Italy    | 40.1636 | 15.9003 | GWORU094-10  | HM910514-SUPPRESSED |
| RVcoll14F650     | <i>Melitaea athalia</i>   | Greece   | 40.205  | 21.064  | EULEP1261-15 | NA                  |
| RVcoll14F666     | <i>Melitaea athalia</i>   | Greece   | 40.205  | 21.064  | EULEP1270-15 | NA                  |
| RVcoll08H904     | <i>Melitaea celadussa</i> | Spain    | 40.324  | -5.807  | EZSPN473-09  | GU676878            |
| RVcoll08H935     | <i>Melitaea celadussa</i> | Spain    | 40.324  | -5.807  | EZSPN494-09  | GU676899            |
| RVcoll17G017     | <i>Melitaea athalia</i>   | Albania  | 40.34   | 20.67   | EULEP5918-18 | NA                  |
| RVcoll13S845     | <i>Melitaea celadussa</i> | Portugal | 40.389  | -7.534  | WMB4180-14   | NA                  |
| RVcoll14B773     | <i>Melitaea athalia</i>   | Albania  | 40.592  | 20.596  | EULEP1900-15 | NA                  |
| RVcoll08M074     | <i>Melitaea celadussa</i> | Spain    | 40.643  | -2.814  | EZSPN997-09  | GU676161            |
| RVcoll14I410     | <i>Melitaea celadussa</i> | Italy    | 40.69   | 14.996  | WMB4863-14   | NA                  |
| RVcoll210907WR65 | <i>Melitaea celadussa</i> | Spain    | 40.698  | 0.101   | EZSPC1269-10 | HM901454            |
| RVcollLD2631     | <i>Melitaea celadussa</i> | Italy    | 40.729  | 13.834  | WMB3098-14   | NA                  |
| RVcollLD2632     | <i>Melitaea celadussa</i> | Italy    | 40.729  | 13.834  | WMB3099-14   | NA                  |
| RVcoll14O121     | <i>Melitaea athalia</i>   | Greece   | 40.79   | 21.32   | EULEP2988-15 | NA                  |
| RVcoll14I434     | <i>Melitaea celadussa</i> | Italy    | 40.818  | 15.097  | WMB4887-14   | NA                  |
| RVcoll14I426     | <i>Melitaea celadussa</i> | Italy    | 40.834  | 15.071  | WMB4879-14   | NA                  |
| RVcoll14G434     | <i>Melitaea athalia</i>   | Greece   | 40.864  | 21.201  | EULEP1513-15 | NA                  |
| RVcoll08L852     | <i>Melitaea celadussa</i> | Spain    | 40.878  | -3.848  | EZSPN913-09  | GU676244            |
| RVcoll15C002     | <i>Melitaea celadussa</i> | Italy    | 40.96   | 15.595  | BIBSA990-15  | NA                  |
| RVcoll14F538     | <i>Melitaea athalia</i>   | Greece   | 41.371  | 23.633  | EULEP515-15  | NA                  |
| RVcoll14F546     | <i>Melitaea athalia</i>   | Greece   | 41.371  | 23.633  | EULEP1234-15 | NA                  |
| RVcoll15N014     | <i>Melitaea celadussa</i> | Italy    | 41.449  | 15.112  | BIBSA1407-15 | NA                  |
| RVcoll15M836     | <i>Melitaea celadussa</i> | Italy    | 41.457  | 14.382  | BIBSA1343-15 | NA                  |
| RVcoll15M840     | <i>Melitaea celadussa</i> | Italy    | 41.457  | 14.382  | BIBSA1346-15 | NA                  |

|                  |                           |          |          |          |              |          |
|------------------|---------------------------|----------|----------|----------|--------------|----------|
| RVcoll14C353     | <i>Melitaea athalia</i>   | Greece   | 41.504   | 24.4     | EULEP869-15  | NA       |
| RVcoll15M960     | <i>Melitaea celadussa</i> | Italy    | 41.523   | 14.612   | BIBSA1379-15 | NA       |
| RVcoll14D059     | <i>Melitaea athalia</i>   | Bulgaria | 41.624   | 24.701   | EULEP970-15  | NA       |
| RVcoll08J143     | <i>Melitaea celadussa</i> | Portugal | 41.682   | -7.71    | EZSPN583-09  | GU676562 |
| RVcoll13S715     | <i>Melitaea celadussa</i> | Italy    | 41.748   | 15.998   | WMB4158-14   | NA       |
| RVcoll13S742     | <i>Melitaea celadussa</i> | Italy    | 41.82    | 13.32    | WMB4170-14   | NA       |
| RVcoll07Z072     | <i>Melitaea celadussa</i> | Spain    | 41.833   | 2.367    | EZSPC540-09  | GU669727 |
| RVcoll14I494     | <i>Melitaea celadussa</i> | Italy    | 41.908   | 13.343   | WMB4947-14   | NA       |
| RVcoll17G015     | <i>Melitaea athalia</i>   | Albania  | 41.98    | 20.58    | EULEP5916-18 | NA       |
| RVcoll08P221     | <i>Melitaea celadussa</i> | Spain    | 42.354   | 1.951    | WMB3297-14   | NA       |
| RVcoll14U528     | <i>Melitaea athalia</i>   | Albania  | 42.37268 | 19.57273 | EULEP5829-18 | NA       |
| RVcoll12Q707     | <i>Melitaea celadussa</i> | Italy    | 42.4     | 13.767   | WMB2028-13   | NA       |
| RVcoll07C635     | <i>Melitaea celadussa</i> | Spain    | 42.448   | 1.781    | EZSPC539-09  | GU669726 |
| RVcoll07C680     | <i>Melitaea celadussa</i> | Spain    | 42.448   | 1.781    | EZSPC560-09  | GU669707 |
| RVcoll13U092     | <i>Melitaea celadussa</i> | Italy    | 42.46    | 12.937   | WMB5240-14   | NA       |
| RVcoll07C071     | <i>Melitaea celadussa</i> | Spain    | 42.474   | 1.933    | EZROM734-08  | KP870776 |
| RVcoll08P214     | <i>Melitaea celadussa</i> | France   | 42.488   | 1.856    | EZSPM027-09  | GU676006 |
| RVcoll14F407     | <i>Melitaea athalia</i>   | Bulgaria | 42.49    | 22.733   | EULEP1177-15 | NA       |
| RVcoll12Z356     | <i>Melitaea celadussa</i> | Spain    | 42.7     | 0.87     | WMB4040-14   | NA       |
| RVcoll070611MH09 | <i>Melitaea celadussa</i> | Spain    | 42.71    | -0.29    | WMB4553-14   | NA       |
| RVcoll15A914     | <i>Melitaea celadussa</i> | Italy    | 42.76    | 10.27    | OXB964-15    | NA       |
| RVcoll15A915     | <i>Melitaea celadussa</i> | Italy    | 42.76    | 10.27    | OXB965-15    | NA       |
| RVcoll15A916     | <i>Melitaea celadussa</i> | Italy    | 42.76    | 10.27    | OXB966-15    | NA       |
| RVcoll08M915     | <i>Melitaea celadussa</i> | Spain    | 42.765   | 0.712    | EZSPN1010-09 | GU676148 |
| RVcoll08P394     | <i>Melitaea celadussa</i> | Spain    | 42.776   | 0.832    | EZSPC207-09  | KP870866 |
| RVcoll08P395     | <i>Melitaea celadussa</i> | Spain    | 42.776   | 0.832    | EZSPC257-09  | KP870367 |
| RVcoll14O127     | <i>Melitaea celadussa</i> | Italy    | 42.954   | 13.211   | EULEP2994-15 | NA       |

|              |                           |        |          |          |              |          |
|--------------|---------------------------|--------|----------|----------|--------------|----------|
| RVcoll12R426 | <i>Melitaea celadussa</i> | Italy  | 42.958   | 10.535   | BIBSA958-15  | NA       |
| RVcollLD2686 | <i>Melitaea celadussa</i> | Italy  | 42.968   | 10.531   | WMB4686-14   | NA       |
| RVcoll15N097 | <i>Melitaea celadussa</i> | Italy  | 43.05    | 10.62    | OXB1143-15   | NA       |
| RVcoll15N098 | <i>Melitaea celadussa</i> | Italy  | 43.05    | 10.62    | OXB1144-15   | NA       |
| RVcoll12R404 | <i>Melitaea celadussa</i> | Italy  | 43.081   | 11.169   | BIBSA957-15  | NA       |
| RVcoll10C728 | <i>Melitaea celadussa</i> | Italy  | 43.136   | 11.56    | WMB1082-13   | NA       |
| RVcoll08J851 | <i>Melitaea celadussa</i> | Spain  | 43.154   | -4.92    | EZSPM304-09  | GU675930 |
| RVcoll16L393 | <i>Melitaea celadussa</i> | Spain  | 43.15631 | -4.91212 | NA           | NA       |
| RVcoll12Q078 | <i>Melitaea celadussa</i> | France | 43.237   | 6.334    | WMB1775-13   | NA       |
| RVcoll12P876 | <i>Melitaea celadussa</i> | France | 43.349   | 5.73     | WMB1727-13   | NA       |
| RVcoll12P926 | <i>Melitaea celadussa</i> | France | 43.352   | 5.826    | WMB5156-14   | NA       |
| RVcoll14F060 | <i>Melitaea athalia</i>   | Serbia | 43.368   | 22.594   | EULEP514-15  | NA       |
| RVcoll14F120 | <i>Melitaea athalia</i>   | Serbia | 43.386   | 22.592   | EULEP1096-15 | NA       |
| RVcoll14F303 | <i>Melitaea athalia</i>   | Serbia | 43.392   | 22.612   | EULEP1142-15 | NA       |
| RVcoll14F327 | <i>Melitaea athalia</i>   | Serbia | 43.392   | 22.612   | EULEP1149-15 | NA       |
| RVcoll14F216 | <i>Melitaea athalia</i>   | Serbia | 43.396   | 22.368   | EULEP1122-15 | NA       |
| RVcoll15N099 | <i>Melitaea celadussa</i> | Italy  | 43.48    | 11.835   | OXB1145-15   | NA       |
| RVcoll15A927 | <i>Melitaea celadussa</i> | Italy  | 43.501   | 10.451   | OXB977-15    | NA       |
| RVcoll10B642 | <i>Melitaea celadussa</i> | France | 43.554   | 5.73     | WMB3486-14   | NA       |
| RVcoll10B644 | <i>Melitaea celadussa</i> | France | 43.554   | 5.73     | WMB111-11    | NA       |
| RVcoll12Q105 | <i>Melitaea celadussa</i> | France | 43.569   | 6.566    | WMB3968-14   | NA       |
| RVcoll12Q106 | <i>Melitaea celadussa</i> | France | 43.569   | 6.566    | WMB1779-13   | NA       |
| RVcoll16C719 | <i>Melitaea celadussa</i> | Italy  | 43.78    | 11.665   | BIBSA1842-17 | NA       |
| RVcoll14J820 | <i>Melitaea celadussa</i> | France | 43.782   | 2.727    | WMB5381-14   | NA       |
| RVcoll19C206 | <i>Melitaea celadussa</i> | Italy  | 43.814   | 11.767   | BIBSA2059-19 | NA       |
| RVcoll16C754 | <i>Melitaea celadussa</i> | Italy  | 43.924   | 11.792   | BIBSA1862-17 | NA       |
| RVcoll09X863 | <i>Melitaea celadussa</i> | Italy  | 44.063   | 10.807   | BIBSA951-15  | NA       |

|              |                           |         |         |         |              |          |
|--------------|---------------------------|---------|---------|---------|--------------|----------|
| RVcoll14L226 | <i>Melitaea celadussa</i> | Italy   | 44.078  | 12.206  | WMB5095-14   | NA       |
| RVcoll14V142 | <i>Melitaea celadussa</i> | Italy   | 44.1021 | 10.2326 | EULEP4253-16 | NA       |
| RVcoll15N100 | <i>Melitaea celadussa</i> | Italy   | 44.116  | 11.236  | OXB1146-15   | NA       |
| RVcoll14E989 | <i>Melitaea athalia</i>   | Serbia  | 44.122  | 20.015  | EULEP1070-15 | NA       |
| RVcoll14A525 | <i>Melitaea celadussa</i> | Italy   | 44.125  | 10.777  | WMB4317-14   | NA       |
| RVcoll14E904 | <i>Melitaea athalia</i>   | Serbia  | 44.156  | 19.693  | EULEP1040-15 | NA       |
| RVcoll14E908 | <i>Melitaea athalia</i>   | Serbia  | 44.156  | 19.693  | EULEP1042-15 | NA       |
| RVcoll14E043 | <i>Melitaea celadussa</i> | Italy   | 44.186  | 7.271   | BIBSA247-15  | NA       |
| RVcoll12O623 | <i>Melitaea celadussa</i> | France  | 44.201  | 7.074   | WMB1599-13   | NA       |
| RVcoll12O624 | <i>Melitaea celadussa</i> | France  | 44.201  | 7.074   | WMB3799-14   | NA       |
| RVcoll14E853 | <i>Melitaea athalia</i>   | Serbia  | 44.361  | 21.892  | EULEP1030-15 | NA       |
| RVcoll14E859 | <i>Melitaea athalia</i>   | Serbia  | 44.361  | 21.892  | EULEP1031-15 | NA       |
| OXB TGS1313  | <i>Melitaea celadussa</i> | France  | 44.4866 | 5.38041 | OXB1595-16   | NA       |
| RVcoll14I538 | <i>Melitaea celadussa</i> | Italy   | 44.487  | 9.497   | WMB4991-14   | NA       |
| RVcoll14D573 | <i>Melitaea celadussa</i> | Italy   | 44.52   | 8.7     | BIBSA124-15  | NA       |
| OXB TGS1289  | <i>Melitaea celadussa</i> | France  | 44.534  | 5.37034 | OXB1571-16   | NA       |
| RVcoll11I830 | <i>Melitaea celadussa</i> | France  | 44.559  | 5.36    | WMB1834-13   | NA       |
| OXB TGS1286  | <i>Melitaea celadussa</i> | France  | 44.7995 | 5.25968 | OXB1568-16   | NA       |
| OXB TGS1290  | <i>Melitaea celadussa</i> | France  | 44.7995 | 5.25968 | OXB1572-16   | NA       |
| OXB TGS1306  | <i>Melitaea celadussa</i> | France  | 44.7995 | 5.25968 | OXB1588-16   | NA       |
| RVcoll11I949 | <i>Melitaea celadussa</i> | France  | 44.81   | 5.585   | WMB1850-13   | NA       |
| RVcoll07E394 | <i>Melitaea athalia</i>   | Romania | 44.812  | 25.397  | EZROM406-08  | HQ004756 |
| RVcoll07D976 | <i>Melitaea athalia</i>   | Romania | 44.914  | 25.641  | EZROM405-08  | HQ004760 |
| RVcoll15A948 | <i>Melitaea celadussa</i> | Italy   | 44.931  | 10.366  | OXB998-15    | NA       |
| RVcoll08M222 | <i>Melitaea athalia</i>   | Romania | 44.971  | 25.687  | EZRMN099-08  | HQ004748 |
| RVcoll15A953 | <i>Melitaea celadussa</i> | Italy   | 44.974  | 10.414  | OXB1003-15   | NA       |
| RVcoll15A654 | <i>Melitaea celadussa</i> | Italy   | 45.328  | 9.509   | OXB1121-15   | NA       |

|              |                           |             |          |         |              |          |
|--------------|---------------------------|-------------|----------|---------|--------------|----------|
| RVcoll14I118 | <i>Melitaea celadussa</i> | Italy       | 45.492   | 8.313   | BIBSA450-15  | NA       |
| RVcoll14I193 | <i>Melitaea celadussa</i> | Italy       | 45.58647 | 8.23158 | BIBSA1439-16 | NA       |
| GWOTD804-12  | <i>Melitaea athalia</i>   | Croatia     | 45.613   | 16.75   | GWOTD804-12  | KX045246 |
| RVcoll15H149 | <i>Melitaea celadussa</i> | Italy       | 45.6332  | 7.3223  | EULEP4256-16 | NA       |
| RVcoll07E205 | <i>Melitaea celadussa</i> | Italy       | 45.667   | 7.23    | NA           | NA       |
| RVcoll14U807 | <i>Melitaea celadussa</i> | Italy       | 45.7     | 10.86   | OXB844-15    | NA       |
| RVcoll14U808 | <i>Melitaea celadussa</i> | Italy       | 45.7     | 10.86   | OXB845-15    | NA       |
| RVcoll07D295 | <i>Melitaea athalia</i>   | Romania     | 45.777   | 25.115  | EZROM404-08  | HQ004759 |
| GBLAA1948-15 | <i>Melitaea celadussa</i> | Italy       | 45.796   | 10.091  | GBLAA1948-15 | NA       |
| LEPAA083-16  | <i>Melitaea celadussa</i> | Switzerland | 45.9068  | 8.92058 | NA           | MK186560 |
| LEPPA1215-17 | <i>Melitaea celadussa</i> | Switzerland | 46.0061  | 7.76137 | NA           | MK186565 |
| RVcoll13U151 | <i>Melitaea celadussa</i> | Italy       | 46.02    | 12.255  | OXB725-15    | NA       |
| RVcoll13U124 | <i>Melitaea celadussa</i> | Italy       | 46.024   | 12.28   | OXB721-15    | NA       |
| LEPAA663-16  | <i>Melitaea celadussa</i> | Switzerland | 46.0956  | 6.98608 | NA           | MK186570 |
| RVcoll15M133 | <i>Melitaea celadussa</i> | France      | 46.116   | 5.628   | OXB1273-15   | NA       |
| RVcoll15M140 | <i>Melitaea celadussa</i> | France      | 46.116   | 5.628   | OXB1280-15   | NA       |
| RVcoll15M147 | <i>Melitaea celadussa</i> | France      | 46.116   | 5.628   | OXB1421-15   | NA       |
| RVcoll14N054 | <i>Melitaea celadussa</i> | Italy       | 46.153   | 8.333   | OXB340-15    | NA       |
| LEPAA303-16  | <i>Melitaea celadussa</i> | Switzerland | 46.1783  | 8.79844 | NA           | MK186567 |
| LEPAA302-16  | <i>Melitaea celadussa</i> | Switzerland | 46.1798  | 8.66895 | NA           | MK186569 |
| RVcoll14K068 | <i>Melitaea celadussa</i> | Switzerland | 46.181   | 7.417   | EULEP2157-15 | NA       |
| RVcoll15J251 | <i>Melitaea celadussa</i> | Switzerland | 46.188   | 8.09289 | EULEP4248-16 | NA       |
| RVcoll14L242 | <i>Melitaea celadussa</i> | Italy       | 46.203   | 10.808  | WMB5111-14   | NA       |
| RVcoll15G573 | <i>Melitaea celadussa</i> | Switzerland | 46.20536 | 8.03352 | EULEP4255-16 | NA       |
| RVcoll14O001 | <i>Melitaea celadussa</i> | Italy       | 46.247   | 10.834  | OXB612-15    | NA       |
| RVcoll14L240 | <i>Melitaea celadussa</i> | Italy       | 46.263   | 10.836  | WMB5109-14   | NA       |
| RVcoll14I580 | <i>Melitaea celadussa</i> | Italy       | 46.276   | 9.885   | WMB5033-14   | NA       |

|              |                           |             |          |          |              |          |
|--------------|---------------------------|-------------|----------|----------|--------------|----------|
| RVcoll14N073 | <i>Melitaea celadussa</i> | Italy       | 46.276   | 9.885    | OXB359-15    | NA       |
| LEPAA634-16  | <i>Melitaea celadussa</i> | Switzerland | 46.2764  | 7.37377  | NA           | MK186568 |
| LEATC245-13  | <i>Melitaea celadussa</i> | Italy       | 46.288   | 11.201   | LEATC245-13  | NA       |
| RVcoll15G464 | <i>Melitaea celadussa</i> | Switzerland | 46.29313 | 8.02021  | EULEP4260-16 | NA       |
| RVcoll15G841 | <i>Melitaea celadussa</i> | Italy       | 46.2936  | 8.27976  | EULEP4235-16 | NA       |
| RVcoll15G804 | <i>Melitaea celadussa</i> | Italy       | 46.2958  | 8.30077  | EULEP4234-16 | NA       |
| RVcoll15G530 | <i>Melitaea celadussa</i> | Switzerland | 46.29767 | 8.06368  | EULEP4254-16 | NA       |
| RVcoll15G608 | <i>Melitaea celadussa</i> | Switzerland | 46.29767 | 8.06368  | EULEP4233-16 | NA       |
| RVcoll14N063 | <i>Melitaea celadussa</i> | Italy       | 46.301   | 9.842    | OXB349-15    | NA       |
| GWOSZ215-11  | <i>Melitaea celadussa</i> | Italy       | 46.3013  | 11.4457  | GWOSZ215-11  | KX040384 |
| RVcoll11J148 | <i>Melitaea celadussa</i> | Switzerland | 46.327   | 7.971    | EULEP647-15  | NA       |
| RVcoll15H332 | <i>Melitaea celadussa</i> | Switzerland | 46.3339  | 7.9393   | EULEP4238-16 | NA       |
| LEPPA1211-17 | <i>Melitaea celadussa</i> | Switzerland | 46.3461  | 9.58222  | NA           | MK186561 |
| RVcoll14V894 | <i>Melitaea celadussa</i> | France      | 46.36541 | 5.898327 | EULEP4291-16 | NA       |
| RVcoll15G134 | <i>Melitaea celadussa</i> | France      | 46.36541 | 5.898327 | EULEP4258-16 | NA       |
| RVcoll15G136 | <i>Melitaea celadussa</i> | France      | 46.36541 | 5.898327 | EULEP4259-16 | NA       |
| RVcoll15G145 | <i>Melitaea celadussa</i> | France      | 46.36541 | 5.898327 | EULEP4289-16 | NA       |
| RVcoll15G160 | <i>Melitaea celadussa</i> | France      | 46.36541 | 5.898327 | EULEP4292-16 | NA       |
| RVcoll15G184 | <i>Melitaea celadussa</i> | France      | 46.36541 | 5.898327 | NA           | NA       |
| RVcoll15G187 | <i>Melitaea celadussa</i> | France      | 46.36541 | 5.898327 | EULEP4290-16 | NA       |
| RVcoll14V302 | <i>Melitaea celadussa</i> | Italy       | 46.37312 | 9.360379 | NA           | NA       |
| RVcoll15I087 | <i>Melitaea athalia</i>   | Italy       | 46.3959  | 13.4342  | EULEP4242-16 | NA       |
| RVcoll15I041 | <i>Melitaea athalia</i>   | Italy       | 46.4147  | 13.4403  | EULEP4241-16 | NA       |
| LEPPA1212-17 | <i>Melitaea celadussa</i> | Switzerland | 46.4496  | 6.2022   | NA           | MK186562 |
| RVcoll15G991 | <i>Melitaea celadussa</i> | Switzerland | 46.4588  | 8.6818   | EULEP4236-16 | NA       |
| RVcoll15L848 | <i>Melitaea athalia</i>   | Italy       | 46.46    | 13.67    | BIBSA1115-15 | NA       |
| RVcoll15L850 | <i>Melitaea athalia</i>   | Italy       | 46.46    | 13.67    | NA           | NA       |

|              |                           |             |          |          |              |                     |
|--------------|---------------------------|-------------|----------|----------|--------------|---------------------|
| RVcoll15L852 | <i>Melitaea athalia</i>   | Italy       | 46.46    | 13.67    | BIBSA1116-15 | NA                  |
| RVcoll13U295 | <i>Melitaea athalia</i>   | Italy       | 46.482   | 12.315   | NA           | NA                  |
| RVcoll13U296 | <i>Melitaea athalia</i>   | Italy       | 46.482   | 12.315   | OXB740-15    | NA                  |
| RVcoll15H589 | <i>Melitaea celadussa</i> | Switzerland | 46.4969  | 9.9086   | EULEP4239-16 | NA                  |
| LEATD293-13  | <i>Melitaea celadussa</i> | Italy       | 46.52    | 10.48    | LEATD293-13  | NA                  |
| LEPAA540-16  | <i>Melitaea celadussa</i> | Switzerland | 46.544   | 6.72157  | NA           | MK186564            |
| RVcoll11J063 | <i>Melitaea celadussa</i> | Switzerland | 46.566   | 8.364    | EULEP635-15  | NA                  |
| RVcoll11J064 | <i>Melitaea celadussa</i> | Switzerland | 46.566   | 8.364    | NA           | NA                  |
| RVcoll13U438 | <i>Melitaea athalia</i>   | Italy       | 46.589   | 12.853   | OXB747-15    | NA                  |
| RVcoll13U440 | <i>Melitaea athalia</i>   | Italy       | 46.589   | 12.853   | NA           | NA                  |
| PHLAH288-12  | <i>Melitaea celadussa</i> | Switzerland | 46.593   | 8.656    | PHLAH288-12  | NA                  |
| PHLAC444-10  | <i>Melitaea celadussa</i> | Italy       | 46.597   | 11.439   | PHLAC444-10  | JF860020            |
| RVcoll15H191 | <i>Melitaea celadussa</i> | Switzerland | 46.65392 | 8.04986  | EULEP4257-16 | NA                  |
| RVcoll15H751 | <i>Melitaea celadussa</i> | Switzerland | 46.6616  | 9.5994   | EULEP4240-16 | NA                  |
| RVcoll06M839 | <i>Melitaea athalia</i>   | Romania     | 46.671   | 23.567   | EZROM403-08  | HQ004758            |
| LEASS514-17  | <i>Melitaea athalia</i>   | Austria     | 46.6833  | 13.9167  | LEASS514-17  | NA                  |
| RVcoll08M346 | <i>Melitaea athalia</i>   | Romania     | 46.743   | 25.664   | EZRMN100-08  | HQ004749            |
| RVcoll15I495 | <i>Melitaea celadussa</i> | Austria     | 46.78895 | 12.87467 | EULEP4244-16 | NA                  |
| RVcoll08M597 | <i>Melitaea athalia</i>   | Romania     | 46.793   | 25.683   | EZRMN101-08  | HQ004750            |
| RVcoll06K602 | <i>Melitaea athalia</i>   | Romania     | 46.799   | 23.959   | EZROM402-08  | HQ004757            |
| PHLAB360-10  | <i>Melitaea celadussa</i> | Switzerland | 46.833   | 9.633    | PHLAB360-10  | HQ968519-SUPPRESSED |
| RVcoll15I360 | <i>Melitaea athalia</i>   | Austria     | 46.86858 | 13.42624 | EULEP4243-16 | NA                  |
| LEPPA1216-17 | <i>Melitaea celadussa</i> | Switzerland | 46.888   | 9.47257  | NA           | MK186566            |
| LEASS497-17  | <i>Melitaea athalia</i>   | Austria     | 46.9508  | 12.9669  | LEASS497-17  | NA                  |
| PHLAI519-13  | <i>Melitaea celadussa</i> | Austria     | 46.963   | 10.592   | PHLAI519-13  | NA                  |
| LEPPA1213-17 | <i>Melitaea celadussa</i> | Switzerland | 46.9802  | 9.34459  | NA           | MK186563            |
| LEPAA436-16  | <i>Melitaea athalia</i>   | Switzerland | 46.9938  | 8.16171  | NA           | MK186544            |

|              |                           |             |          |          |              |                     |
|--------------|---------------------------|-------------|----------|----------|--------------|---------------------|
| LEASS880-17  | <i>Melitaea athalia</i>   | Austria     | 47.0512  | 12.8078  | LEASS880-17  | NA                  |
| LEATJ1299-16 | <i>Melitaea athalia</i>   | Austria     | 47.122   | 15.488   | LEATJ1299-16 | NA                  |
| RVcoll15I809 | <i>Melitaea athalia</i>   | Austria     | 47.14822 | 13.38144 | EULEP4247-16 | NA                  |
| LEATF462-14  | <i>Melitaea athalia</i>   | Austria     | 47.19    | 11.1     | LEATF462-14  | NA                  |
| KM572443.1   | <i>Melitaea celadussa</i> | Austria     | 47.243   | 9.872    | NA           | KM572443.1          |
| PHLSA657-11  | <i>Melitaea celadussa</i> | Austria     | 47.243   | 9.872    | PHLSA657-11  | KM572443            |
| PHLAB326-10  | <i>Melitaea celadussa</i> | Austria     | 47.252   | 9.686    | PHLAB326-10  | HQ968488-SUPPRESSED |
| LEPAA408-16  | <i>Melitaea athalia</i>   | Switzerland | 47.3554  | 7.76953  | NA           | MK186545            |
| LEASS489-17  | <i>Melitaea athalia</i>   | Austria     | 47.4278  | 13.6178  | LEASS489-17  | NA                  |
| RVcoll15I661 | <i>Melitaea athalia</i>   | Austria     | 47.4597  | 13.6181  | EULEP4245-16 | NA                  |
| GWOSN694-11  | <i>Melitaea athalia</i>   | Germany     | 47.557   | 11.433   | GWOSN694-11  | KX046864            |
| GWORR680-10  | <i>Melitaea athalia</i>   | Germany     | 47.5572  | 11.4333  | GWORR680-10  | KX040677            |
| LEATJ1296-16 | <i>Melitaea athalia</i>   | Austria     | 47.56    | 14.58    | LEATJ1296-16 | NA                  |
| PHLAH287-12  | <i>Melitaea celadussa</i> | Austria     | 47.58    | 9.759    | PHLAH287-12  | KP253620            |
| RVcoll15I725 | <i>Melitaea athalia</i>   | Austria     | 47.59278 | 13.58146 | EULEP4246-16 | NA                  |
| LEATJ1298-16 | <i>Melitaea athalia</i>   | Austria     | 47.595   | 13.883   | LEATJ1298-16 | NA                  |
| LEATJ1297-16 | <i>Melitaea athalia</i>   | Austria     | 47.608   | 14.746   | LEATJ1297-16 | NA                  |
| RVcoll07C312 | <i>Melitaea athalia</i>   | Romania     | 47.667   | 26.65    | EZROM693-08  | HQ004754            |
| RVcoll07C314 | <i>Melitaea athalia</i>   | Romania     | 47.667   | 26.65    | EZROM694-08  | HQ004755            |
| RVcoll08M103 | <i>Melitaea athalia</i>   | Romania     | 47.667   | 26.65    | EZRMN372-08  | HQ004751            |
| RVcoll08M104 | <i>Melitaea athalia</i>   | Romania     | 47.667   | 26.65    | EZRMN373-08  | HQ004752            |
| RVcoll08M105 | <i>Melitaea athalia</i>   | Romania     | 47.667   | 26.65    | EZRMN374-08  | HQ004753            |
| GWORA2499-09 | <i>Melitaea celadussa</i> | Germany     | 47.67    | 12.04    | GWORA2499-09 | KX040937            |
| GWOSK889-11  | <i>Melitaea athalia</i>   | Germany     | 47.7272  | 11.5451  | GWOSK889-11  | JN274550-SUPPRESSED |
| ABOLD023-16  | <i>Melitaea athalia</i>   | Austria     | 47.75    | 16.167   | ABOLD023-16  | NA                  |
| GWORR679-10  | <i>Melitaea athalia</i>   | Germany     | 47.801   | 11.464   | GWORR679-10  | KX040599            |
| GWOSN693-11  | <i>Melitaea athalia</i>   | Germany     | 47.803   | 11.4622  | GWOSN693-11  | KX047245            |

|               |                         |           |          |         |              |                     |
|---------------|-------------------------|-----------|----------|---------|--------------|---------------------|
| RVcoll16J000  | <i>Melitaea athalia</i> | Slovakia  | 48.6139  | 20.4172 | EULEP5036-16 | NA                  |
| GWORA2497-09  | <i>Melitaea athalia</i> | Germany   | 48.878   | 12.451  | GWORA2497-09 | HM393215-SUPPRESSED |
| FBLMU112-09   | <i>Melitaea athalia</i> | Germany   | 48.884   | 13.153  | FBLMU112-09  | GU707192-SUPPRESSED |
| GWORA2498-09  | <i>Melitaea athalia</i> | Germany   | 48.946   | 12.855  | GWORA2498-09 | KX040596            |
| GWOSA739-10   | <i>Melitaea athalia</i> | Germany   | 48.99    | 13.35   | GWOSA739-10  | HQ565470-SUPPRESSED |
| GWOSA740-10   | <i>Melitaea athalia</i> | Germany   | 48.99    | 13.35   | GWOSA740-10  | HQ565471-SUPPRESSED |
| FBLMT898-09   | <i>Melitaea athalia</i> | Germany   | 49.0314  | 11.9626 | FBLMT898-09  | GU655013            |
| RVcoll15G067  | <i>Melitaea athalia</i> | France    | 49.07129 | 7.50562 | EULEP4250-16 | NA                  |
| FBLMU119-09   | <i>Melitaea athalia</i> | Germany   | 49.1678  | 11.9452 | FBLMU119-09  | GU707188            |
| FBLMZ162-12   | <i>Melitaea athalia</i> | Germany   | 49.1678  | 11.9452 | FBLMZ162-12  | KX040860            |
| RVcoll14I815  | <i>Melitaea athalia</i> | Slovakia  | 49.229   | 20.317  | EULEP2015-15 | NA                  |
| BCZSMlep50476 | <i>Melitaea athalia</i> | Germany   | 49.2654  | 12.3892 | NA           | NA                  |
| FBLMX265-11   | <i>Melitaea athalia</i> | Germany   | 49.2654  | 12.3892 | FBLMX265-11  | KP870791            |
| RVcoll14V075  | <i>Melitaea athalia</i> | Ukraine   | 49.817   | 35.75   | EULEP2380-15 | NA                  |
| RVcoll14V084  | <i>Melitaea athalia</i> | Ukraine   | 50.117   | 36.067  | EULEP2387-15 | NA                  |
| RVcoll16H716  | <i>Melitaea athalia</i> | Belgium   | 50.1388  | 4.62144 | EULEP4820-16 | NA                  |
| RVcoll15P033  | <i>Melitaea athalia</i> | Ukraine   | 50.31    | 29.11   | EULEP4252-16 | NA                  |
| RVcoll14N413  | <i>Melitaea athalia</i> | Ukraine   | 51.01    | 32.11   | EULEP2234-15 | NA                  |
| RVcoll16I052  | <i>Melitaea athalia</i> | Poland    | 52.819   | 14.2346 | EULEP4939-16 | NA                  |
| RVcoll16J612  | <i>Melitaea athalia</i> | Russia    | 54.3856  | 22.3677 | EULEP4909-16 | NA                  |
| RVcoll15Q076  | <i>Melitaea athalia</i> | Russia    | 54.8176  | 34.5609 | EULEP4267-16 | NA                  |
| RVcoll15Q078  | <i>Melitaea athalia</i> | Russia    | 54.8176  | 34.5609 | EULEP4251-16 | NA                  |
| EULEP347-14   | <i>Melitaea athalia</i> | Lithuania | 55.18    | 25.23   | EULEP347-14  | MM23832             |
| EULEP348-14   | <i>Melitaea athalia</i> | Lithuania | 55.213   | 26.708  | EULEP348-14  | MM23833             |
| LOWA290-06    | <i>Melitaea athalia</i> | Russia    | 56.133   | 28.667  | LOWA290-06   | FJ663813            |
| LOWA291-06    | <i>Melitaea athalia</i> | Russia    | 56.133   | 28.667  | LOWA291-06   | FJ663812            |
| LON203-08     | <i>Melitaea athalia</i> | Sweden    | 56.59    | 16.42   | LON203-08    | KX049391            |

|              |                           |         |          |          |              |                     |
|--------------|---------------------------|---------|----------|----------|--------------|---------------------|
| EULEP317-14  | <i>Melitaea athalia</i>   | Latvia  | 56.73    | 23.88    | EULEP317-14  | MM23802             |
| RVcoll10A789 | <i>Melitaea athalia</i>   | Estonia | 58.1072  | 26.9178  | EULEP4230-16 | NA                  |
| RVcoll12Z197 | <i>Melitaea athalia</i>   | Sweden  | 59.612   | 18.485   | EULEP785-15  | NA                  |
| LEFIJ549-10  | <i>Melitaea athalia</i>   | Finland | 59.945   | 22.4     | LEFIJ549-10  | JF853664-SUPPRESSED |
| LON023-08    | <i>Melitaea athalia</i>   | Norway  | 60.8867  | 12.2347  | LON023-08    | KX048533            |
| LEFID245-10  | <i>Melitaea athalia</i>   | Finland | 65.782   | 24.51    | LEFID245-10  | HM873044-SUPPRESSED |
| LEFIE848-10  | <i>Melitaea athalia</i>   | Finland | 65.861   | 24.371   | LEFIE848-10  | HM874567-SUPPRESSED |
| RVcoll16H415 | <i>Melitaea athalia</i>   | Sweden  | 67.87876 | 18.90235 | EULEP4784-16 | NA                  |
| RVcoll18O960 | <i>Melitaea celadussa</i> | Italy   | 44.5919  | 7.0801   | NA           | NA                  |
| RVcoll18P029 | <i>Melitaea celadussa</i> | Italy   | 44.5919  | 7.0801   | NA           | NA                  |
| RVcoll18P030 | <i>Melitaea celadussa</i> | Italy   | 44.5919  | 7.0801   | NA           | NA                  |
| RVcoll18P031 | <i>Melitaea celadussa</i> | Italy   | 44.5919  | 7.0801   | NA           | NA                  |
| RVcoll18P033 | <i>Melitaea celadussa</i> | Italy   | 44.5919  | 7.0801   | NA           | NA                  |
| RVcoll18P041 | <i>Melitaea celadussa</i> | Italy   | 46.3     | 8.3      | NA           | NA                  |
| RVcoll18P047 | <i>Melitaea celadussa</i> | Italy   | 46.39    | 8.42     | NA           | NA                  |
| RVcoll17F943 | <i>Melitaea athalia</i>   | Albania | 42.61648 | 19.67813 | NA           | NA                  |
| RVcoll17E766 | <i>Melitaea celadussa</i> | France  | 45.539   | 2.756    | NA           | NA                  |
| RVcoll17D269 | <i>Melitaea celadussa</i> | France  | 45.38743 | 4.596897 | NA           | NA                  |
| RVcoll17C887 | <i>Melitaea athalia</i>   | Germany | 49.64492 | 7.151968 | NA           | NA                  |
| RVcoll17C750 | <i>Melitaea celadussa</i> | France  | 48.03363 | 4.441152 | NA           | NA                  |
| RVcoll17C668 | <i>Melitaea athalia</i>   | France  | 47.28357 | 3.472961 | NA           | NA                  |
| RVcoll17C613 | <i>Melitaea athalia</i>   | France  | 46.58978 | 1.263415 | NA           | NA                  |
| RVcoll15M156 | <i>Melitaea celadussa</i> | France  | 46.116   | 5.628    | NA           | NA                  |
| RVcoll15G197 | <i>Melitaea celadussa</i> | France  | 46.36541 | 5.898327 | NA           | NA                  |
| RVcoll13U297 | <i>Melitaea athalia</i>   | Italy   | 46.482   | 12.315   | BIBSA2099-20 | NA                  |
| RVcoll14W716 | <i>Melitaea celadussa</i> | Italy   | 46.263   | 10.836   | BIBSA2112-20 | NA                  |
| RVcoll15L869 | <i>Melitaea athalia</i>   | Italy   | 46.197   | 13.534   | BIBSA2114-20 | NA                  |

|              |                           |        |        |        |              |    |
|--------------|---------------------------|--------|--------|--------|--------------|----|
| RVcoll16G235 | <i>Melitaea celadussa</i> | Italy  | 46.95  | 11.854 | BIBSA2115-20 | NA |
| RVcoll19E019 | <i>Melitaea celadussa</i> | Italy  | 43.303 | 12.053 | BIBSA2151-20 | NA |
| RVcoll19E025 | <i>Melitaea celadussa</i> | Italy  | 43.303 | 12.053 | BIBSA2157-20 | NA |
| RVcoll12R008 | <i>Melitaea celadussa</i> | Italy  | 37.967 | 14.75  | BIBSA2222-20 | NA |
| RVcoll12R012 | <i>Melitaea celadussa</i> | Italy  | 37.97  | 14.77  | BIBSA2223-20 | NA |
| MBMPA005-07  | <i>Melitaea athalia</i>   | Russia | 50.485 | 45.678 | MBMPA005-07  | NA |
| MBMPA009-07  | <i>Melitaea athalia</i>   | Russia | 50.485 | 45.678 | MBMPA009-07  | NA |
| MBMPA013-07  | <i>Melitaea athalia</i>   | Russia | 50.485 | 45.678 | MBMPA013-07  | NA |
| MBMPA020-07  | <i>Melitaea athalia</i>   | Russia | 50.485 | 45.678 | MBMPA020-07  | NA |
| MBMPA021-07  | <i>Melitaea athalia</i>   | Russia | 50.485 | 45.678 | MBMPA021-07  | NA |
| MBMPA036-07  | <i>Melitaea athalia</i>   | Russia | 50.485 | 45.678 | MBMPA036-07  | NA |
| MBMPA103-07  | <i>Melitaea athalia</i>   | Russia | 54.8   | 37.4   | MBMPA103-07  | NA |
| MBMPA107-07  | <i>Melitaea athalia</i>   | Russia | 54.8   | 37.4   | MBMPA107-07  | NA |
| MBMPA112-07  | <i>Melitaea athalia</i>   | Russia | 54.8   | 37.4   | MBMPA112-07  | NA |
| MBMPA118-07  | <i>Melitaea athalia</i>   | Russia | 54.8   | 37.4   | MBMPA118-07  | NA |
| MBMPA121-07  | <i>Melitaea athalia</i>   | Russia | 54.8   | 37.4   | MBMPA121-07  | NA |
| MBMPA127-07  | <i>Melitaea athalia</i>   | Russia | 54.8   | 37.4   | MBMPA127-07  | NA |
| MBMPA128-07  | <i>Melitaea athalia</i>   | Russia | 54.8   | 37.4   | MBMPA128-07  | NA |
| MBMPA131-07  | <i>Melitaea athalia</i>   | Russia | 54.8   | 37.4   | MBMPA131-07  | NA |
| MBMPA139-07  | <i>Melitaea athalia</i>   | Russia | 54.8   | 37.4   | MBMPA139-07  | NA |
| MBMPA141-07  | <i>Melitaea athalia</i>   | Russia | 54.8   | 37.4   | MBMPA141-07  | NA |
| MBMPA142-07  | <i>Melitaea athalia</i>   | Russia | 54.8   | 37.4   | MBMPA142-07  | NA |
| MBMPA144-07  | <i>Melitaea athalia</i>   | Russia | 54.8   | 37.4   | MBMPA144-07  | NA |
| MBMPA145-07  | <i>Melitaea athalia</i>   | Russia | 54.8   | 37.4   | MBMPA145-07  | NA |
| MBMPA149-07  | <i>Melitaea athalia</i>   | Russia | 54.8   | 37.4   | MBMPA149-07  | NA |
| MBMPA152-07  | <i>Melitaea athalia</i>   | Russia | 54.8   | 37.4   | MBMPA152-07  | NA |
| MBMPA153-07  | <i>Melitaea athalia</i>   | Russia | 54.8   | 37.4   | MBMPA153-07  | NA |

|             |                         |        |        |        |             |    |
|-------------|-------------------------|--------|--------|--------|-------------|----|
| MBMPA174-07 | <i>Melitaea athalia</i> | Russia | 50.485 | 45.678 | MBMPA174-07 | NA |
| MBMPA176-07 | <i>Melitaea athalia</i> | Russia | 50.485 | 45.678 | MBMPA176-07 | NA |
| MBMPA185-07 | <i>Melitaea athalia</i> | Russia | 50.485 | 45.678 | MBMPA185-07 | NA |
| MBMPA186-07 | <i>Melitaea athalia</i> | Russia | 50.485 | 45.678 | MBMPA186-07 | NA |
| MBMPA200-09 | <i>Melitaea athalia</i> | Russia | 55.42  | 60.46  | MBMPA200-09 | NA |
| MBMPA204-09 | <i>Melitaea athalia</i> | Russia | 55.42  | 60.46  | MBMPA204-09 | NA |
| MBMPA205-09 | <i>Melitaea athalia</i> | Russia | 55.42  | 60.46  | MBMPA205-09 | NA |
| MBMPA206-09 | <i>Melitaea athalia</i> | Russia | 55.42  | 60.46  | MBMPA206-09 | NA |
| MBMPA208-09 | <i>Melitaea athalia</i> | Russia | 55.42  | 60.46  | MBMPA208-09 | NA |
| MBMPA223-09 | <i>Melitaea athalia</i> | Russia | 56.48  | 59.54  | MBMPA223-09 | NA |
| MBMPA225-09 | <i>Melitaea athalia</i> | Russia | 56.372 | 61.01  | MBMPA225-09 | NA |
| MBMPA226-09 | <i>Melitaea athalia</i> | Russia | 56.372 | 61.01  | MBMPA226-09 | NA |
| MBMPA230-09 | <i>Melitaea athalia</i> | Russia | 56.372 | 61.01  | MBMPA230-09 | NA |
| MBMPA232-09 | <i>Melitaea athalia</i> | Russia | 54.4   | 59.4   | MBMPA232-09 | NA |
| MBMPA234-09 | <i>Melitaea athalia</i> | Russia | 54.4   | 59.4   | MBMPA234-09 | NA |
| MBMPA235-09 | <i>Melitaea athalia</i> | Russia | 54.4   | 59.4   | MBMPA235-09 | NA |
| MBMPA237-09 | <i>Melitaea athalia</i> | Russia | 54.4   | 59.4   | MBMPA237-09 | NA |
| MBMPA001-07 | <i>Melitaea athalia</i> | Russia | 50.485 | 45.678 | MBMPA001-07 | NA |
| MBMPA003-07 | <i>Melitaea athalia</i> | Russia | 50.485 | 45.678 | MBMPA003-07 | NA |
| MBMPA006-07 | <i>Melitaea athalia</i> | Russia | 50.485 | 45.678 | MBMPA006-07 | NA |
| MBMPA007-07 | <i>Melitaea athalia</i> | Russia | 50.485 | 45.678 | MBMPA007-07 | NA |
| MBMPA014-07 | <i>Melitaea athalia</i> | Russia | 50.485 | 45.678 | MBMPA014-07 | NA |
| MBMPA015-07 | <i>Melitaea athalia</i> | Russia | 50.485 | 45.678 | MBMPA015-07 | NA |
| MBMPA019-07 | <i>Melitaea athalia</i> | Russia | 50.485 | 45.678 | MBMPA019-07 | NA |
| MBMPA027-07 | <i>Melitaea athalia</i> | Russia | 50.485 | 45.678 | MBMPA027-07 | NA |
| MBMPA034-07 | <i>Melitaea athalia</i> | Russia | 50.485 | 45.678 | MBMPA034-07 | NA |
| MBMPA099-07 | <i>Melitaea athalia</i> | Russia | 54.8   | 37.4   | MBMPA099-07 | NA |

|             |                         |        |        |        |             |    |
|-------------|-------------------------|--------|--------|--------|-------------|----|
| MBMPA100-07 | <i>Melitaea athalia</i> | Russia | 54.8   | 37.4   | MBMPA100-07 | NA |
| MBMPA102-07 | <i>Melitaea athalia</i> | Russia | 54.8   | 37.4   | MBMPA102-07 | NA |
| MBMPA104-07 | <i>Melitaea athalia</i> | Russia | 54.8   | 37.4   | MBMPA104-07 | NA |
| MBMPA105-07 | <i>Melitaea athalia</i> | Russia | 54.8   | 37.4   | MBMPA105-07 | NA |
| MBMPA109-07 | <i>Melitaea athalia</i> | Russia | 54.8   | 37.4   | MBMPA109-07 | NA |
| MBMPA113-07 | <i>Melitaea athalia</i> | Russia | 54.8   | 37.4   | MBMPA113-07 | NA |
| MBMPA114-07 | <i>Melitaea athalia</i> | Russia | 54.8   | 37.4   | MBMPA114-07 | NA |
| MBMPA116-07 | <i>Melitaea athalia</i> | Russia | 54.8   | 37.4   | MBMPA116-07 | NA |
| MBMPA119-07 | <i>Melitaea athalia</i> | Russia | 54.8   | 37.4   | MBMPA119-07 | NA |
| MBMPA120-07 | <i>Melitaea athalia</i> | Russia | 54.8   | 37.4   | MBMPA120-07 | NA |
| MBMPA122-07 | <i>Melitaea athalia</i> | Russia | 54.8   | 37.4   | MBMPA122-07 | NA |
| MBMPA123-07 | <i>Melitaea athalia</i> | Russia | 54.8   | 37.4   | MBMPA123-07 | NA |
| MBMPA124-07 | <i>Melitaea athalia</i> | Russia | 54.8   | 37.4   | MBMPA124-07 | NA |
| MBMPA125-07 | <i>Melitaea athalia</i> | Russia | 54.8   | 37.4   | MBMPA125-07 | NA |
| MBMPA133-07 | <i>Melitaea athalia</i> | Russia | 54.8   | 37.4   | MBMPA133-07 | NA |
| MBMPA134-07 | <i>Melitaea athalia</i> | Russia | 54.8   | 37.4   | MBMPA134-07 | NA |
| MBMPA135-07 | <i>Melitaea athalia</i> | Russia | 54.8   | 37.4   | MBMPA135-07 | NA |
| MBMPA137-07 | <i>Melitaea athalia</i> | Russia | 54.8   | 37.4   | MBMPA137-07 | NA |
| MBMPA148-07 | <i>Melitaea athalia</i> | Russia | 54.8   | 37.4   | MBMPA148-07 | NA |
| MBMPA150-07 | <i>Melitaea athalia</i> | Russia | 54.8   | 37.4   | MBMPA150-07 | NA |
| MBMPA151-07 | <i>Melitaea athalia</i> | Russia | 54.8   | 37.4   | MBMPA151-07 | NA |
| MBMPA155-07 | <i>Melitaea athalia</i> | Russia | 54.8   | 37.4   | MBMPA155-07 | NA |
| MBMPA156-07 | <i>Melitaea athalia</i> | Russia | 54.8   | 37.4   | MBMPA156-07 | NA |
| MBMPA177-07 | <i>Melitaea athalia</i> | Russia | 50.485 | 45.678 | MBMPA177-07 | NA |
| MBMPA181-07 | <i>Melitaea athalia</i> | Russia | 50.485 | 45.678 | MBMPA181-07 | NA |
| MBMPA188-07 | <i>Melitaea athalia</i> | Russia | 50.485 | 45.678 | MBMPA188-07 | NA |
| MBMPA199-09 | <i>Melitaea athalia</i> | Russia | 55.42  | 60.46  | MBMPA199-09 | NA |

|             |                         |        |        |        |             |    |
|-------------|-------------------------|--------|--------|--------|-------------|----|
| MBMPA201-09 | <i>Melitaea athalia</i> | Russia | 55.42  | 60.46  | MBMPA201-09 | NA |
| MBMPA202-09 | <i>Melitaea athalia</i> | Russia | 55.42  | 60.46  | MBMPA202-09 | NA |
| MBMPA207-09 | <i>Melitaea athalia</i> | Russia | 55.42  | 60.46  | MBMPA207-09 | NA |
| MBMPA227-09 | <i>Melitaea athalia</i> | Russia | 56.372 | 61.01  | MBMPA227-09 | NA |
| MBMPA228-09 | <i>Melitaea athalia</i> | Russia | 54.4   | 59.4   | MBMPA228-09 | NA |
| MBMPA229-09 | <i>Melitaea athalia</i> | Russia | 54.4   | 59.4   | MBMPA229-09 | NA |
| MBMPA233-09 | <i>Melitaea athalia</i> | Russia | 54.4   | 59.4   | MBMPA233-09 | NA |
| MBMPA238-09 | <i>Melitaea athalia</i> | Russia | 54.4   | 59.4   | MBMPA238-09 | NA |
| EZHBA657-07 | <i>Melitaea athalia</i> | Russia | 54.6   | 83.3   | EZHBA657-07 | NA |
| MBMPA029-07 | <i>Melitaea athalia</i> | Russia | 50.485 | 45.678 | MBMPA029-07 | NA |
| MBMPA032-07 | <i>Melitaea athalia</i> | Russia | 50.485 | 45.678 | MBMPA032-07 | NA |
| MBMPA035-07 | <i>Melitaea athalia</i> | Russia | 50.485 | 45.678 | MBMPA035-07 | NA |
| MBMPA095-07 | <i>Melitaea athalia</i> | Russia | 54.8   | 37.4   | MBMPA095-07 | NA |
| MBMPA096-07 | <i>Melitaea athalia</i> | Russia | 54.8   | 37.4   | MBMPA096-07 | NA |
| MBMPA097-07 | <i>Melitaea athalia</i> | Russia | 54.8   | 37.4   | MBMPA097-07 | NA |
| MBMPA098-07 | <i>Melitaea athalia</i> | Russia | 54.8   | 37.4   | MBMPA098-07 | NA |
| MBMPA101-07 | <i>Melitaea athalia</i> | Russia | 54.8   | 37.4   | MBMPA101-07 | NA |
| MBMPA106-07 | <i>Melitaea athalia</i> | Russia | 54.8   | 37.4   | MBMPA106-07 | NA |
| MBMPA108-07 | <i>Melitaea athalia</i> | Russia | 54.8   | 37.4   | MBMPA108-07 | NA |
| MBMPA110-07 | <i>Melitaea athalia</i> | Russia | 54.8   | 37.4   | MBMPA110-07 | NA |
| MBMPA111-07 | <i>Melitaea athalia</i> | Russia | 54.8   | 37.4   | MBMPA111-07 | NA |
| MBMPA115-07 | <i>Melitaea athalia</i> | Russia | 54.8   | 37.4   | MBMPA115-07 | NA |
| MBMPA117-07 | <i>Melitaea athalia</i> | Russia | 54.8   | 37.4   | MBMPA117-07 | NA |
| MBMPA126-07 | <i>Melitaea athalia</i> | Russia | 54.8   | 37.4   | MBMPA126-07 | NA |
| MBMPA129-07 | <i>Melitaea athalia</i> | Russia | 54.8   | 37.4   | MBMPA129-07 | NA |
| MBMPA130-07 | <i>Melitaea athalia</i> | Russia | 54.8   | 37.4   | MBMPA130-07 | NA |
| MBMPA132-07 | <i>Melitaea athalia</i> | Russia | 54.8   | 37.4   | MBMPA132-07 | NA |

|             |                         |        |        |        |             |    |
|-------------|-------------------------|--------|--------|--------|-------------|----|
| MBMPA136-07 | <i>Melitaea athalia</i> | Russia | 54.8   | 37.4   | MBMPA136-07 | NA |
| MBMPA138-07 | <i>Melitaea athalia</i> | Russia | 54.8   | 37.4   | MBMPA138-07 | NA |
| MBMPA140-07 | <i>Melitaea athalia</i> | Russia | 54.8   | 37.4   | MBMPA140-07 | NA |
| MBMPA143-07 | <i>Melitaea athalia</i> | Russia | 54.8   | 37.4   | MBMPA143-07 | NA |
| MBMPA146-07 | <i>Melitaea athalia</i> | Russia | 54.8   | 37.4   | MBMPA146-07 | NA |
| MBMPA147-07 | <i>Melitaea athalia</i> | Russia | 54.8   | 37.4   | MBMPA147-07 | NA |
| MBMPA154-07 | <i>Melitaea athalia</i> | Russia | 54.8   | 37.4   | MBMPA154-07 | NA |
| MBMPA157-07 | <i>Melitaea athalia</i> | Russia | 54.8   | 37.4   | MBMPA157-07 | NA |
| MBMPA169-07 | <i>Melitaea athalia</i> | Russia | 50.485 | 45.678 | MBMPA169-07 | NA |
| MBMPA182-07 | <i>Melitaea athalia</i> | Russia | 50.485 | 45.678 | MBMPA182-07 | NA |
| MBMPA183-07 | <i>Melitaea athalia</i> | Russia | 50.485 | 45.678 | MBMPA183-07 | NA |
| MBMPA203-09 | <i>Melitaea athalia</i> | Russia | 55.42  | 60.46  | MBMPA203-09 | NA |
| MBMPA219-09 | <i>Melitaea athalia</i> | Russia | 51.285 | 57.253 | MBMPA219-09 | NA |
| MBMPA220-09 | <i>Melitaea athalia</i> | Russia | 51.285 | 57.253 | MBMPA220-09 | NA |
| MBMPA224-09 | <i>Melitaea athalia</i> | Russia | 56.48  | 59.54  | MBMPA224-09 | NA |
| MBMPA231-09 | <i>Melitaea athalia</i> | Russia | 54.4   | 59.4   | MBMPA231-09 | NA |

## Bibliography

1. Dincă V, Zakharov E V, Hebert PDN, Vila R. Complete DNA barcode reference library for a country's butterfly fauna reveals high performance for temperate Europe. *Proc R Soc B Biol Sci.* 2011 Feb;278(1704):347–55.
2. Dincă V, Montagud S, Talavera G, Hernández-Roldán J, Munguira ML, García-Barros E, et al. DNA barcode reference library for Iberian butterflies enables a continental-scale preview of potential cryptic diversity. *Sci Rep.* 2015 Dec;5(1):12395.
3. Dincă V, Dapporto L, Somervuo P, Vodă R, Cuvelier S, Gascoigne-Pees M, et al. High resolution DNA barcode library for European butterflies reveals continental patterns of mitochondrial genetic diversity. *Commun Biol.* 2021;4(1):1–11.
4. Kumar S, Stecher G, Li M, Knyaz C, Tamura K. MEGA X: molecular evolutionary genetics analysis across computing platforms. *Mol Biol Evol.* 2018;35(6):1547–9.
5. Van Oorschot H, Coutsis JG. The Genus *Melitaea* Fabricius, 1807: Taxonomy and Systematics with Special Reference to the Male Genitalia:(Lepidoptera, Nymphalidae, Nymphalinae). Tshikolovets Publications; 2014.
6. Dapporto L, Ramazzotti M, Fattorini S, Talavera G, Vila R, Dennis RLH. recluster: an unbiased clustering procedure for beta-diversity turnover. *Ecography (Cop).* 2013;36(10):1070–5.
7. Robinson GS. The preparation of slides of Lepidoptera genitalia with special reference to the Microlepidoptera. *Entomol Gaz.* 1976;27(2):127–32.
8. Higgins LG. Classification of European butterflies. Collins; 1975.
9. Chessel D, Dufour A-B, Dray S, Lobry JR, Ollier S, Pavoine S, et al. ade4. 2017. Available from: <http://pbil.univ-lyon1.fr/ADE-4/home.php?lang=eng>
10. Lee KM, Kivelä SM, Ivanov V, Hausmann A, Kaila L, Wahlberg N, et al. Information dropout patterns in restriction site associated DNA phylogenomics and a comparison with multilocus Sanger data in a species-rich moth genus. *Syst Biol.* 2018;67(6):925–39.
